**Title: Dynamics of brain-fluid circulation are altered in the mature-onset Tet-off APP mouse model of amyloidosis**

**Author list:** Inès R.H. Ben-Nejma<sup>1#\*</sup>, Aneta J. Keliris<sup>1#\*</sup>, Verdi Vanreusel<sup>1,3</sup>, Peter Ponsaerts<sup>2</sup>, Annemie Van der Linden<sup>1</sup>, Georgios A. Keliris<sup>1\*</sup>

**Author affiliations:**

<sup>1</sup>Bio-Imaging Lab, University of Antwerp, Universiteitsplein 1, 2610 Wilrijk, Antwerp, Belgium.

<sup>2</sup>Laboratory of Experimental Hematology, Vaccine and Infectious Disease Institute (Vaxinfectio), University of Antwerp, Universiteitsplein 1, 2610 Wilrijk, Antwerp, Belgium.

<sup>3</sup>Research in dosimetric applications, SCK CEN, Boeretang 200, 2400 Mol, Antwerp, Belgium.

# equal contribution

\*corresponding author(s)

**Corresponding authors:**

Inès R.H. Ben-Nejma  
e-mail: [InesRHBenNejma@icloud.com](mailto:InesRHBenNejma@icloud.com)

Dr. Aneta J. Keliris  
e-mail: [AnetaJolanta.Keliris@uantwerpen.be](mailto:AnetaJolanta.Keliris@uantwerpen.be)

Dr. Georgios A. Keliris  
e-mail: [neuro@georgioskeliris.com](mailto:neuro@georgioskeliris.com)

**Keywords:** glymphatic system, mature-onset Tet-off mice, forebrain amyloidosis, amyloid-beta, DCE-MRI, inflammation

1 **ABSTRACT**

2 Alzheimer's disease (AD), the most common type of dementia, is an incurable brain disorder  
3 characterised by the progressive build-up of toxic amyloid-beta ( $A\beta$ ) and tau protein aggregates. AD  
4 gradually inflicts cognitive functions of an individual such as memory, thinking, reasoning, and  
5 language by degrading synaptic function and the integrity of neuronal networks. It has been recently  
6 suggested that the efficacy of different brain-clearance systems like the glymphatic system (GS),  
7 involved in the removal of toxic waste and homeostatic balance, plays a key role in the pathology of  
8 AD. Moreover, the observed coupling between brain fluid movement and global brain activity implies  
9 that an alteration of the neuronal network integrity can impact brain fluid circulation throughout the  
10 brain and thereby the efficacy of the GS. Here, we investigated the dynamics of brain fluid circulation  
11 in Tet-Off APP (AD) mice, a mature-onset model of amyloidosis in which we have recently shown a  
12 deterioration of neuronal network integrity by resting-state fMRI. By utilizing dynamic contrast  
13 enhanced-MRI and gadoteric acid (Gd-DOTA)  $T_1$  contrast agent injected into the cisterna magna, we  
14 demonstrated that brain fluid exchange was significantly altered in 14-month-old AD mice compared  
15 to control littermates. More specifically, AD mice showed higher Gd-DOTA accumulation in areas  
16 proximal to the injection cite and computational modeling of time courses demonstrated significantly  
17 lower inflow time constants relative to the controls. Immunohistochemistry demonstrated abundant  
18 amyloid plaque burden in the forebrain of the AD group coinciding with extensive astrogliosis and  
19 microgliosis. The neuroinflammatory responses were also found in plaque-devoid regions, potentially  
20 impacting brain fluid circulation.

## 21 INTRODUCTION

22 Alzheimer's disease (AD) is a progressive and still incurable devastating neurodegenerative disorder,  
23 clinically identifiable by a gradual cognitive decline, eventually leading to dementia and death  
24 (Dubois et al. 2016; Long and Holtzman 2019). AD is primarily characterised by the accumulation of  
25 amyloid-beta ( $A\beta$ ) and tau abnormal proteins deposits, which coincides with the disruption of the  
26 neuro-glial-vascular unit function and inflammation (Querfurth and LaFerla 2010; Zlokovic 2011;  
27 Soto-Rojas et al. 2021). The efficacy of debris removal via interacting brain clearance systems is  
28 believed to play an important role in the pathology of AD (Zlokovic et al. 2000; Weller et al. 2008; Iliff  
29 et al. 2012; Aspelund et al. 2015; Tarasoff-Conway et al. 2015; Louveau et al. 2017; Hladky and  
30 Barrand 2018; Mestre, Mori, and Nedergaard 2020). The more recently discovered glymphatic and  
31 brain lymphatic systems drew particularly attention and became of keen interest in the scientific  
32 community. The glymphatic system (GS), a brain-wide perivascular network of cerebrospinal fluid  
33 (CSF) and interstitial (ISF) fluid exchange that is facilitated by aquaporin-4 (AQP4) water channels  
34 expressed at astrocytic end-feet, has been shown to be critically involved in the clearance of  $A\beta$  and  
35 tau proteins from the brain (Iliff et al. 2012; Xie et al. 2013; Peng et al. 2016; Iliff et al. 2014; Harrison  
36 et al. 2020). Further, the CSF movement from the subarachnoid space to the paravascular space was  
37 shown to be driven by a combination of factors, such as cardiac and respiratory pulsations, sleep,  
38 vasomotion and CSF pressure gradients (Iliff, Lee, et al. 2013; Jessen et al. 2015; Xie et al. 2013; Iliff,  
39 Wang, et al. 2013; Mestre, Tithof, et al. 2018).

40 Importantly, the efficacy of glymphatic exchange was shown to decrease rapidly upon ageing in wild-  
41 type mice (Kress et al. 2014). Since ageing is the major risk factor for the prevalent in humans (~98%)  
42 late-onset AD (LOAD), age-related impairments of glymphatic circulation could be playing a key role  
43 in the progression of AD pathology. However, most of the commonly used transgenic models in AD  
44 research were generated based on genetic autosomal dominant mutations of early-onset AD (EOAD;  
45 <65 years old) (Jankowsky and Zheng 2017), such as the APP/PS1 and the 5xFAD (Radde et al. 2006;  
46 Oblak et al. 2021). One potential drawback these transgenic models have in common is the

47 transgenic gene overexpression or overproduction of amyloid/tau during critical postnatal brain  
48 development phases.

49 Following the discovery of the GS and its implicated importance in the pathology of AD, several  
50 groups have used EOAD models to study glymphatic clearance and the factors governing its efficacy  
51 in AD. In effect, it was shown that glymphatic transport was affected in both young and old APP/PS1  
52 mice compared to wild-type littermates (Peng et al. 2016). Further, Xu et al. showed that deletion of  
53 AQP4 in APP/PS1 mice resulted in aggravation of amyloid- $\beta$  accumulation and memory impairment  
54 (Xu et al. 2015; Feng et al. 2020). In addition, the perivascular localisation of AQP4 channels is  
55 postulated to be essential in maintaining the efficacy of the GS and has been shown to be declining  
56 with age (Kress et al. 2014), but to be also related to certain stages of AD pathology (Zeppenfeld et  
57 al. 2017; Yang et al. 2011).

58 On the other hand, ultra-fast magnetic resonance encephalography (MREG) imaging at rest  
59 demonstrated unique spatiotemporal patterns of low frequency signals (<0.01 Hz), which were  
60 associated with glymphatic dynamics of CSF movement in the human brain (Kiviniemi et al. 2016). In  
61 addition, it has been demonstrated that during non-rapid eye movement (NREM) sleep, CSF  
62 dynamics are coupled with global resting-state functional MRI (rsfMRI) signals, implying a neural  
63 origin (Fultz et al. 2019). Moreover, Han and colleagues pointed out the strong coupling between  
64 global rsfMRI signals and CSF flow, which was correlated with stages of AD-related pathology  
65 including the cortical A $\beta$  levels, suggesting a potential link to glymphatic flow and brain waste  
66 clearance (Han et al. 2021). Thus, the brain activity-associated large-scale neuronal modulations may  
67 directly impact the efficacy of the glymphatic clearance in the brain parenchyma. Moreover, ageing  
68 was associated with reduced and more fragmented slow-wave sleep, particularly in AD (Lloret et al.  
69 2020; Mander, Winer, and Walker 2017), but also with a decreased CSF flux, where a massive  
70 depolarization of astrocytic AQP4 was found (Kress et al. 2014).

71 Furthermore, the dysfunction of the resting-state neuronal networks detected at advanced stages of  
72 AD in humans (Badhwar et al. 2017; Greicius et al. 2004) was also observed in several different

73 transgenic EOAD amyloidosis mouse models overexpressing amyloid precursor protein (APP) during  
74 the brain postnatal development (Grandjean et al. 2016; Shah et al. 2013). Recently, we have  
75 reported the impairment of global resting-state neuronal network integrity in a mature-onset Tet-Off  
76 APP mouse model of amyloidosis, in which the APP overexpression was ‘turned-on’ in adulthood (3-  
77 month-old mice) when the brain can be considered as mature. This important manipulation ensures  
78 that APP overexpression and A $\beta$  overproduction does not occur during brain postnatal development  
79 that could create false-positive phenotypes unrelated to AD (Ben-Nejma et al. 2019). For instance,  
80 circulating toxic A $\beta$  species might have a different impact on neuronal circuits, cell signalling or  
81 synapse formation in mature and immature mice (Jankowsky and Zheng 2017; Sri et al. 2019).  
82 With an eye on the bidirectionality of interactions between CSF circulation and global rsfMRI signals,  
83 here we decided to investigate the efficacy and dynamics of CSF-ISF exchange in Tet-Off APP mice, in  
84 which we previously observed the dysfunction of global neuronal networks at stages of advanced  
85 amyloidosis. We sought to investigate if and how the dynamics of brain-fluid circulation could be  
86 affected in this model, in which a potential obstruction of the glymphatic pathways was to be  
87 expected in areas with heavy amyloid plaque load such as the forebrain, and importantly in  
88 comparison to aged littermates in order to differentiate changes related to ageing from those driven  
89 by AD pathology.

## 90 **MATERIALS AND METHODS**

91 ***Mouse strain, dox treatment and housing.*** Generation of the Tet-Off APP transgenic mice has been  
92 described in detail in our previous study (Ben-Nejma et al. 2019). Briefly, this inducible model of  
93 amyloidosis allows a time-controlled expression of a chimeric mouse/human APP695 transgene using  
94 the Tet-Off system. The bigenic tetO-APP<sup>swe/ind</sup> (line 107) animals (strain B6.Cg-Tg(tetO-  
95 APP<sup>SwInd</sup>)107Dbo/Mmjax, referred to as AD mice in the manuscript) were bred in-house by crossing  
96 APP mice, in which a tetracycline-responsive (tetO) promoter drives the expression of the chimeric  
97 APP transgene bearing the Swedish and Indiana mutations (mo/huAPP695<sup>swe/ind</sup>), with transgenic

98 mice expressing the tetracycline-Transactivator (tTA) gene (strain B6;CBA-Tg(Camk2a-tTA)1Mmay/J).  
99 The single transgenic tTA and APP males (Prof. Dr JoAnne McLaurin, Sunnybrook Health Sciences  
100 Centre, Toronto, Canada) were initially crossed with non-transgenic females on a C57BL6/J  
101 background (Charles River, France) to establish the single transgenic colonies. Since the tTA  
102 transgene is under control of the CaMKII $\alpha$  promoter, the bigenic mice express APP in a neuron-  
103 specific manner at moderate levels, essentially in the forebrain (Jankowsky et al. 2005). The APP  
104 expression was ‘turned-off’ up to the age of 3 months (3m, young adult mice) by feeding females  
105 with litters and weaned pups with a specific chow supplemented with doxycycline (DOX), a derivate  
106 of tetracycline (antibiotics, 100 mg/kg Doxycycline diet, Envigo RMS B.V., The Netherlands) from P3  
107 up to 3m. To induce APP expression in the bigenic mice, all in-house bred transgene carrier and non-  
108 transgenic carrier (NTg) littermates were switched to a regular chow from 3m onward until the day  
109 of the surgery (14m old) resulting in a total APP expression duration of 11m. Of note, we reused the  
110 animals that previously completed a longitudinal rsfMRI study, presented in our recent work (Ben-  
111 Nejma et al. 2019). The mice genotypes are indicated in figure schemes or legends throughout the  
112 manuscript. Animals were housed in an environment with controlled temperature and humidity and  
113 on a 12h light–dark cycle, and water was provided ad libitum. All experiments were approved and  
114 performed in strict accordance with the European Directive 2010/63/EU on the protection of animals  
115 used for scientific purposes. The protocols were approved by the Committee on Animal Care and Use  
116 at the University of Antwerp, Belgium (permit number 2014–76).

117 **Surgery.** The injection of gadolinium (Gd)-based T<sub>1</sub> contrast agent, gadoteric acid (Gd-DOTA) into the  
118 cisterna magna (CM) was performed in spontaneously breathing mice anesthetized with 2%  
119 isoflurane (3% for short induction) delivered in oxygen by adapting a previously reported protocol  
120 (Gaberel et al. 2014; Xavier et al. 2018). Briefly, the animal was positioned in a custom-made  
121 stereotaxic frame with its head pointing down to expose the CM. A midline incision was made from  
122 the occipital crest down to the first vertebrae. Then, the underlying muscles were gently separated

123 and maintained pulled aside using two curved forceps. The CM appeared as a small, inverted triangle  
124 overlaid with the translucent dural membrane, in between the cerebellum and the medulla. After  
125 exposing the CM, 2.5  $\mu$ l of 50 mM solution of Gd-DOTA (DOTAREM<sup>®</sup>, Guerbert, France) was injected  
126 at 0.55  $\mu$ l/min via a pulled haematological glass micropipette attached to a nanoinjector (Nanoject II  
127 Drummond). To avoid leakage, the micropipette was left in place for additional 5 minutes and the  
128 incision was closed with biocompatible superglue. The body temperature was maintained at 37.0°C  
129 with a heating pad.

130 **MRI acquisition.** Following surgery, animals were positioned in MRI-compatible cradle/bed (animal in  
131 prone position) using MRI compatible mouse stereotactic device, including a nose cone to deliver  
132 anaesthetic gas 2% isoflurane (Isoflo<sup>®</sup>, Abbot Laboratories Ltd., Illinois, USA) administered in a  
133 gaseous mixture of 33% oxygen (200 cc/min) and 67% nitrogen (400 cc/min). During the MRI  
134 acquisition, the mice were allowed to breathe spontaneously. The physiological status of the animals  
135 was closely monitored during the entire acquisition. The respiration rate was maintained within  
136 normal physiological range (80-120) breaths/min using a small animal pressure sensitive pad (MR-  
137 compatible Small Animal Monitoring and Gating System, SA instruments, Inc.). The body temperature  
138 was monitored by a rectal probe and maintained at (37.0  $\pm$  0.5) °C using a feedback controlled warm  
139 air system (MR-compatible Small Animal Heating System, SA Instruments, Inc.).

140 All imaging measurements were performed on a 9.4T Biospec MRI system (Bruker BioSpin, Germany)  
141 with the Paravision 6.0 software ([www.bruker.com](http://www.bruker.com)) using a Bruker coil set-up with a quadrature  
142 volume transmit coil and a 2x2 surface array mouse head receiver coil. Axial and sagittal 2D T2-  
143 weighted Turbo RARE images were acquired to ensure uniform slice positioning (RARE; TR/TE  
144 2500/33 ms; 9 slices of 0.7 mm; FOV (20x20) mm<sup>2</sup>; pixel dimensions (0.078x0.078) mm<sup>2</sup>). Dynamic  
145 contrast-enhanced MRI (DCE-MRI) acquisition was performed using a 3D T1-weighted FLASH  
146 sequence (3D T1-FLASH; TR/TE 15/4.3 ms; flip angle 20°) in the sagittal plane. The field-of-view (FOV)  
147 was (18x15x12) mm<sup>3</sup> and the matrix size (96x96x 64), resulting in voxel dimensions of (0.188 x 0.156x

148 0.188) mm<sup>3</sup>. The DCE-MRI scans were acquired every 5 min and started 30 min up to 150 min after  
149 the contrast agent injection. An overview of the experimental setup is summarized in Figure 1.

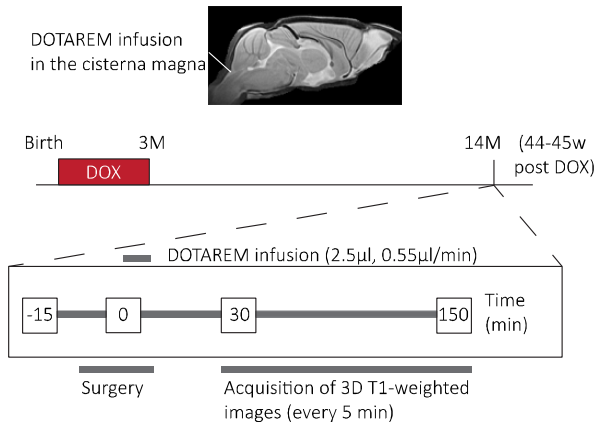

150

151 **Figure 1. Overview of the experimental setup.** The 14 m old animals, AD and CTL, underwent the  
152 surgery after 11 months of amyloid-beta expression. The surgery started a few minutes after the  
153 anaesthesia induction (time point=-15 min) and the start of continuous Gd-DOTA infusion (2.5 µl, 0.55  
154 µl/min) into the cisterna magna refers to the time point  $t = 0$ . The DCE-MRI acquisition (120 min)  
155 started 30-min post Gd-DOTA injection, every 5-min, up to 150-min post injection.

156 **MRI data pre-processing.** Pre-processing of the DCE-MRI data was performed using Advanced  
157 Normalisation Tools (ANTs) including realignment, spatial normalisation and creation of a 3D study  
158 template. First, a mean image has been created across the time series for each subject and a mask  
159 larger than the brain has been delineated on it using AMIRA 5.4. Then, this broad mask has been  
160 applied to the DCE-MRI images to remove the surrounding muscle tissue. In parallel, a study-specific  
161 3D-template based on the last scan of the non-transgene carrier (NTg) group was created using a  
162 global 12-parameter affine transformation followed by a nonlinear deformation protocol. This  
163 template was used to estimate the spatial normalisation parameters of the mean images. Next, the  
164 realignment parameters of all masked DCE-MRI images within each session to the masked mean  
165 image were first estimated, using a symmetric image normalisation method (SyN transformation).



166 Then, the transformation parameters of the realignment and the spatial normalisation were applied  
167 to the DCE-MRI images in one resampling step.

168 Signal intensity normalization was performed in MATLAB (MATLAB R2020a, The MathWorks Inc.  
169 Natick, MA, USA). First, an ellipsoid-shaped region-of-interest (ROI) of 141 voxels was delineated in a  
170 cortical area where the variability of the intensity over time was negligible for the baseline and saline  
171 groups. More specifically, a time frame of six consecutive scans was selected based on the least  
172 changes in the time traces for this specific mask (i.e., intensity values remained approximately  
173 constant). Therefore, the mean intensity value of this mask for these six consecutive scans was used  
174 to convert each voxel of all images to percent signal change. Finally, a smoothing step was performed  
175 with a 3D Gaussian kernel of radius twice the voxel size. A second mask restricted to the brain was  
176 applied to all images.

177 ***MRI data analysis.*** Five groups of 14-month-old mice (14 m) were subjected to DCE-MRI  
178 experiments: a non-transgene carrier (NTg) non-injected group (NONE, N=3), a NTg saline-injected  
179 group (SAL, N=3), a NTg Gd-DOTA injected group (CTL<sub>1</sub>; N=5), a tTA Gd-DOTA injected group (CTL<sub>2</sub>;  
180 N=3) and a bigenic Tet-Off APP Gd-DOTA injected group (AD; N=7). In total 21 mice (14 m, mixed in  
181 gender) were scanned that were reared on Dox diet until 3m of age. Five animals (2 NTg, 1 tTA and 2  
182 AD) have been removed due to surgery failure. Given that tTA animals (CTL<sub>2</sub>) do not produce sA $\beta$  or  
183 amyloid plaques and showed no difference to the NTg littermates (CTL<sub>1</sub>) in our previous resting state  
184 experiments (Jankowsky et al. 2005; Ben-Nejma et al. 2019), these two groups of animals were  
185 combined and are further referred to as control group (CTL, N<sub>CTL</sub> = 5).

186 First, principal component analysis (PCA) was performed per group on the average of the spatially  
187 smoothed and normalised time-courses. As more than 99% of the data variability could be explained  
188 by the three largest components, we used them to reconstruct PCA-based time courses that  
189 effectively reduced high frequency noise from the data. Subsequently, a hierarchical clustering (ward  
190 linkage, maximum 15 clusters) was performed on the reconstructed times courses of all animal

191 groups. This analysis allowed for the identification of clusters of voxels with similar time courses and  
192 to observe the patterns across groups. Then, to have a fair comparison in the same voxels, the  
193 clusters of either the CTL group or the AD group were used to compare the voxel averaged time-  
194 courses of the CTL and AD groups and to assess the dynamics of glymphatic flow based on modelling.  
195 To this end, we sub-selected the clusters with at least 100 voxels that showed a difference between  
196 maximum and minimum intensity of more than 10%. This criterion was selected based on the  
197 variability observed in the NONE and SAL groups for which the time-courses were flat as expected  
198 (see results). Subsequently, PCA was also performed on a subject-by-subject basis to allow for  
199 statistical analysis between the groups (CTL vs. AD). Analyses were performed: a) on six predefined  
200 hypothesis driven regions of interest (ROIs), and b) on the clusters defined based on the group level  
201 PCA of the CTL group as described above. For ROI-based analysis, six relevant ROIs (olfactory bulb,  
202 hippocampus, medulla, pons, aqueduct, and cerebellum) were delineated with MRICroGL based on  
203 the Paxinos atlas (3<sup>rd</sup> edition). Then, for each subject, the mean of the PCA-based time-courses over  
204 the voxels included in each ROI was extracted and the area under the curve (AUC) was calculated and  
205 used for statistical analysis (t-test across the two groups). For cluster-based analysis, the mean over  
206 the voxels included in each cluster was extracted for each subject separately and then the time-  
207 courses of each cluster were fitted using a model with two exponentials based on the following  
208 formula:  $f(t) = c_1 \cdot \left(1 - e^{-\frac{t}{\tau_{in}}}\right) + c_2 \cdot \left(e^{-\frac{t}{\tau_{out}}} - 1\right)$ , with  $c_1$  and  $c_2$  representing gain constants,  $\tau_{in}$   
209 the inflow time constant, and  $\tau_{out}$  the outflow time constant. The estimated  $\tau$ 's for the inflow and  
210 outflow for each cluster per subject were then used for statistical comparison (t-test) across the two  
211 groups.

212 **Statistical analyses.** For the ROI-based analysis, a two-sample *t*-test was performed on the area  
213 under the curve (AUC) values per ROI for the CTL vs. AD groups using MATLAB (MATLAB R2020a).  
214 Similarly, for cluster-based analysis, a two-sample *t*-test was performed on the  $\tau_{in}$  and  $\tau_{out}$  values per

215 cluster across the two groups. Significance was defined with a criterion  $\alpha=0.05$ . All results are shown  
216 as mean  $\pm$  standard errors.

217 **Immunohistochemistry.** Brain samples were collected directly after the MRI acquisition ( $N_{NTg}=3$ ;  
218  $N_{AD}=3$ ) as described previously (Ben-Nejma et al. 2019). Briefly, the mice were deeply anesthetized  
219 with an intraperitoneal injection of 60 mg/ kg/BW pentobarbital (Nembutal; Ceva Sante Animale,  
220 Brussels, Belgium), followed by a transcardial perfusion with ice-cold PBS, and with 4%  
221 paraformaldehyde (Merck Millipore, Merck KGaA, Darmstadt, Germany). Brain-samples were  
222 afterwards surgically removed and post-fixed in 4% paraformaldehyde for 4h. Next, the fixed brains  
223 were freeze-protected using a sucrose gradient (sucrose, Sigma Aldrich): 2h at 5%, 2h at 10%, and  
224 overnight at 20%. Then, the brain samples were snap frozen in liquid nitrogen and stored at  $-80^{\circ}\text{C}$ .  
225 Finally, 14- $\mu\text{m}$ -thickness sagittal brains sections were cut using a cryostat (CryoStar NX70;  
226 ThermoScientific).

227 For immunofluorescence analyses, the following primary antibodies were used: chicken anti-GFAP  
228 (Abcam ab4674, 1:1000), rabbit anti IBA-1 (Wako 019-19741, 1:1000), rabbit anti-AQP4 (Sigma-  
229 Aldrich HPA014784, 1:100) and the following secondary antibodies: donkey anti chicken (Jackson  
230 703-166-155, 1:1000), goat anti rabbit (Jackson 111-096-114, 1:1000) and donkey anti rabbit (Abcam  
231 AF555, 1:1000). Moreover, the amyloid plaques were stained with Thioflavin-S (Santa Cruz  
232 Biotechnology, sc-215969) and the vessels with lectin (Labconsult VEC.DL-1174 (green) or VEC.DL-  
233 1177 (red), 1:200). After the staining, the sections were mounted using Prolong Gold Antifade  
234 (P36930; Invitrogen).

235 Immunofluorescence images of GFAP/lectin, Iba1/lectin, AQP4/lectin and Thioflavin-S/lectin  
236 stainings were acquired using an Olympus BX51 fluorescence microscope equipped with an Olympus  
237 DP71 digital camera and the image acquisition was done with CellSens Imaging Software (Olympus,  
238 Tokyo, Japan, <http://www.olympus-global.com>). Obtained images were visually evaluated by at least

239 three co-workers to ensure the selection of representative images. The 3<sup>rd</sup> edition of the mouse brain  
240 atlas from Paxinos and Franklin was used as reference for the localization of the regions of interest.  
241 Images were further processed with ImageJ Software 1.52k (National Institutes of Health) and  
242 artificially pseudo-coloured in the representative images.

## 243 RESULTS

### 244 *Differences in the spatiotemporal distribution of Gd-DOTA in the Tet-Off APP mice vs. controls.*

245 We first investigated the efficacy of glymphatic transport in 14m old Tet-Off APP (AD) and control  
246 (CTL) mice by assessing the dynamics and distribution patterns of contrast agent (Gd-DOTA) in the  
247 brain. For this, T<sub>1</sub>-weighted contrast-enhanced MR images were acquired sequentially from 30 min to  
248 150 min following the labelling of CSF upon infusion of Gd-DOTA into cisterna magna (t=0). We  
249 detected clear differences in the dynamics of brain-wide distribution patterns of Gd-DOTA, with  
250 reduced rostral glymphatic flow in the AD group and higher accumulation of contrast agent within  
251 caudal regions of the brain (see Figure 2C for an overview of the Gd-DOTA distributions in the brains  
252 of the two groups of animals).

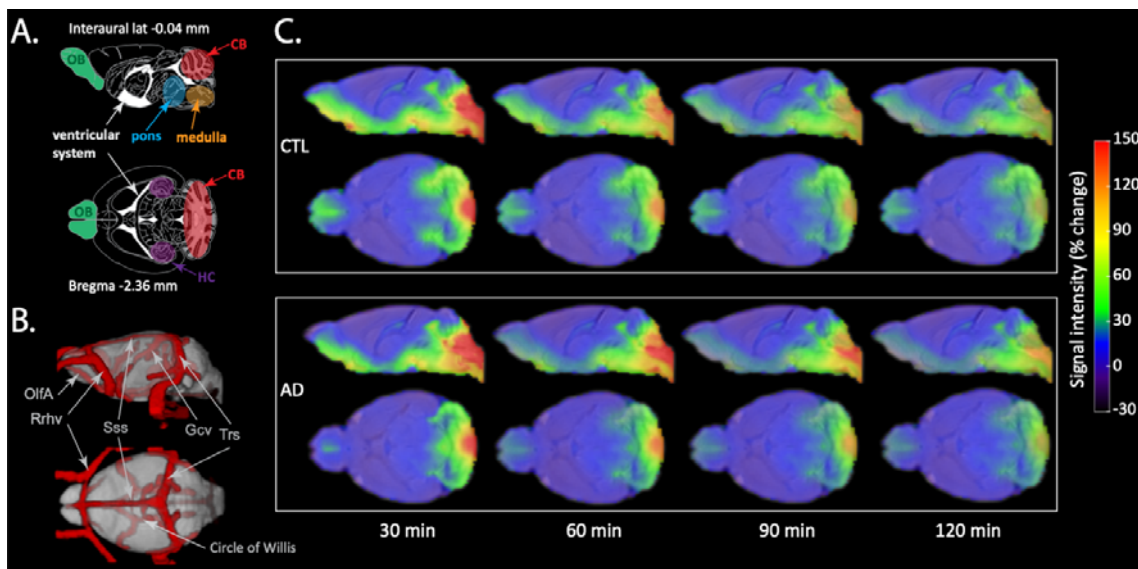

253

254 **Figure 2. Spatial distribution maps of Gd-DOTA in the AD and CTL mice over time.** A. Schematic  
255 representation of the sagittal plane (interaural lateral -0.04 mm) and transverse plane (Bregma level -  
256 2.36 mm) from the Paxinos atlas with highlighted key regions such as olfactory bulb (OB), cerebellum  
257 (CB), hippocampus (HC), pons, medulla and ventricular system. B. 3D visualisation of major blood  
258 vessels based on a recent vascular brain mouse atlas that was aligned to the template of this study  
259 (vascular atlas from (Hinz et al. 2021)). The depicted vessels including OlfA (olfactory artery), Rrhv  
260 (rostral rhinal vein), Gcv (cerebral vein of Galen), Sss (superior sagittal sinus), Trs (transverse sinus)  
261 are located in the vicinity of regions with enhanced contrast. C. The spatial distribution of the MRI  
262 contrast agent in the CTL (top panel) and AD mice (bottom panel) at 30-min, 60-min, 90-min and 120-  
263 min post intracisternal infusion shown in sagittal and transverse views. The colour scale represents  
264 the average percent signal intensity change, with dark blue/red indicating low/high percent signal  
265 intensity change, respectively.

266 In line with the literature, characteristic patterns of GS-related contrast agent distribution were  
267 observed in our CTL mice, with contrast enhancement of the paravascular routes and the adjacent  
268 parenchyma (Iliff et al. 2012; Iliff, Lee, et al. 2013; Gaberel et al. 2014; Gakuba et al. 2018). More  
269 specifically, the CTL mice showed high accumulation of Gd-DOTA at 30-min post injection, reflected  
270 as high signal intensity, in the cisterna magna, ventricular system, ventrally along the circle of Willis  
271 and olfactory paravascular path (Figure 2A-C, top panel), as well as in caudal parenchymal brain  
272 regions including the brainstem (i.e., medulla and pons). Other regions of detected contrast  
273 enhancement included the cerebellum, the pituitary recess, the ventral part of the thalamus and the  
274 olfactory bulb. In addition, contrast enhancement was also observed in the areas adjacent to the  
275 transverse sinuses (see also Additional Figure 1). Starting from 60-min onward, the signal intensity of  
276 the Gd-DOTA started to fade drastically, except for the regions located in the vicinity of the cisterna  
277 magna, which showed higher contrast compared to the rest of the brain.

278 At the imaging onset (t=30 min), the Gd-DOTA distribution for the AD group was spatially largely  
279 similar to the controls, while differences became more pronounced over time (Figure 2C, bottom  
280 panel). In effect, at 30-min post-infusion, we noticed that the  $T_1$  signal intensity was higher at the  
281 caudal brain regions, including the ventral part of the cerebellum, medulla, pons, while lower  
282 contrast enhancement was observed within the olfactory bulb. From 60-min post-infusion onward,  
283 the heterogeneity in spatial differences was evident, with a higher signal intensity of the Gd-DOTA,  
284 retained for a longer time in the brainstem (i.e., pons and medulla) and the ventral part of the  
285 cerebellum (CB). Compared to the CTL group, a lower contrast enhancement was detected within the  
286 olfactory bulb.

### 287 ***Caudal retention and reduced rostral flow of Gd-DOTA in AD mice.***

288 To investigate the glymphatic CSF-ISF exchange in more detail, the quantification of Gd-DOTA  
289 accumulation was assessed within specific anatomical regions. To this end, a ROI-based analysis was  
290 performed with the outcome being illustrated in Figure 3. In line with results highlighted in the  
291 previous section, the AD mice showed significant differences in signal intensity, with much higher  
292 and slower accumulation, time-to-peak, as well as longer retention in the medulla ( $p = 0,0278$ , Figure  
293 3D) and the pons ( $p = 0,0191$ , Figure 3E) compared to CTL mice, while no differences were found in  
294 the olfactory bulb, cerebellum and aqueduct (Figure 3A-C, F). Further, a trend for slightly higher  
295 accumulation of Gd-DOTA, albeit not statistically significant, within hippocampus regions (Fig 3B,  $p =$   
296  $0,1159$ ) was found for CTL littermates. Thus, these data indicated that the glymphatic pathways of  
297 CSF circulation were altered in AD mice, and transport of Gd-DOTA from the cisterna magna towards  
298 the rostral and dorsal aspects of the brain were reduced and accompanied by prolonged  
299 accumulation at the caudal regions (medulla and pons) that are free of amyloid plaques (Jankowsky  
300 et al. 2005).

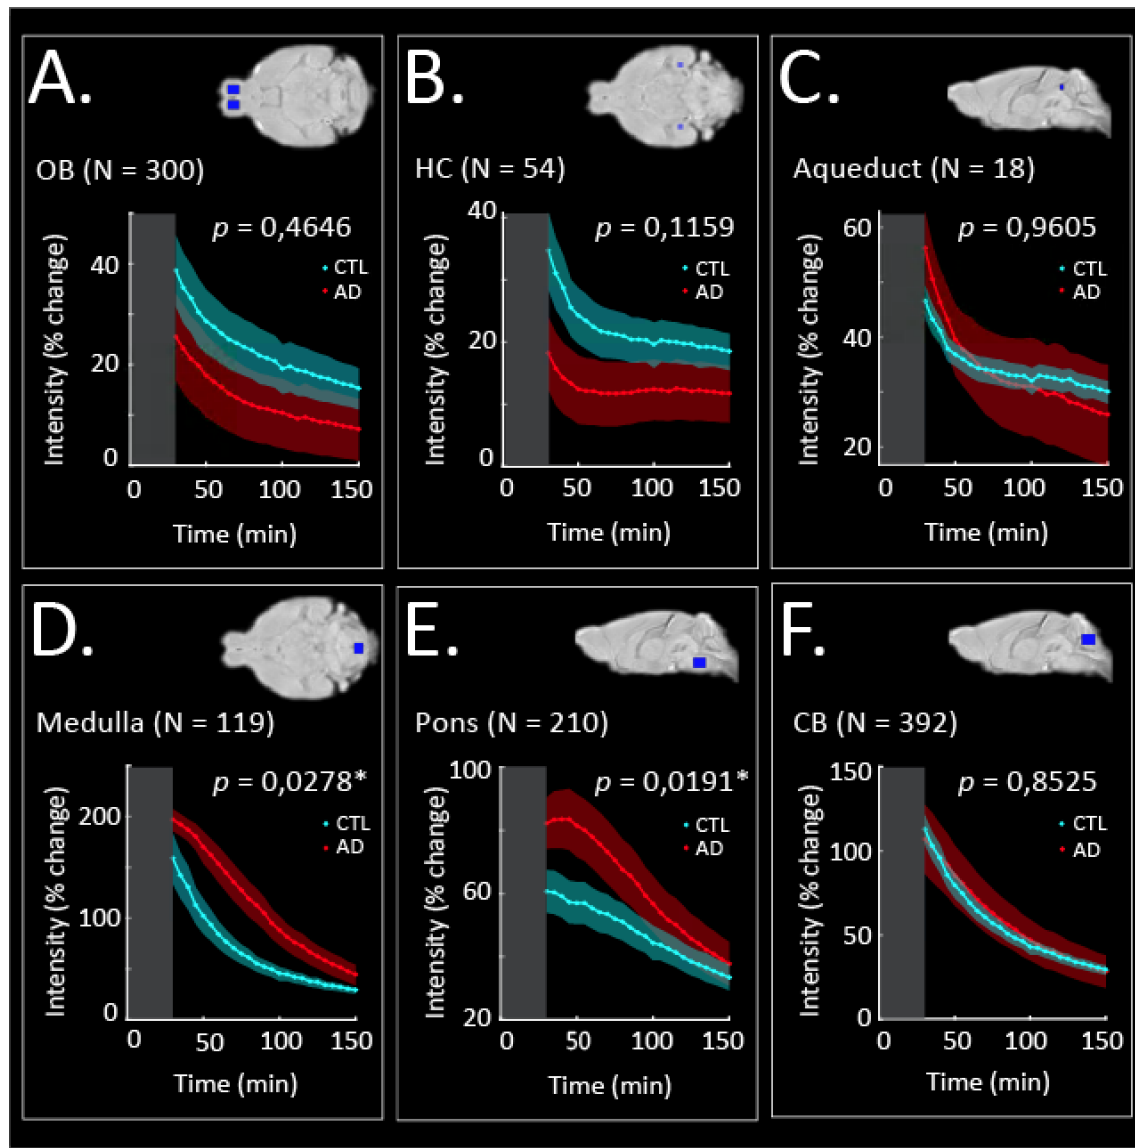

301

302 **Figure 3. Region-of-interest (ROI)-based analysis.** Average signal intensity changes over time  
303 reflecting Gd-DOTA contrast agent distribution in the OB (A), the HC (B), the aqueduct (C), the  
304 medulla (D), the pons (E) and the CB (F) for the CTL (cyan) and the AD (red) groups of mice. The grey  
305 rectangle in each panel represents the pre-acquisition time (acquisition started at 30-min post Gd-  
306 DOTA infusion) with zero indicating the time of injection. An overview of the brain location of each  
307 ROI can be found in the top right corner of each panel (blue rectangles). OB, olfactory bulb; HC,  
308 hippocampus; CB, cerebellum; N, ROI size in voxels, \*; significant difference in the area-under the

309 *curve (AUC) across the two groups indicates a differential distribution of contrast agent ( $p < 0.05$ ; see*  
310 *Materials and Methods).*

311 ***Clustering of voxel time-courses reveals differential Gd-DOTA spatial patterns in AD and CTL mice.***

312 Given the observed differences in the distribution of Gd-DOTA in the selected ROIs over time (Figures  
313 2 & 3), we sought to evaluate whether the similarity of the time-courses of glymphatic circulation  
314 across the brain, could provide information about the distribution patterns and pathways. To this  
315 end, we performed cluster analysis on the group average PCA based time-courses by using the three  
316 largest principal components that could explain ~99% of the data variability. The resulting clustering  
317 maps for each group are shown in Figure 4A and the corresponding time-courses in Figure 4B.



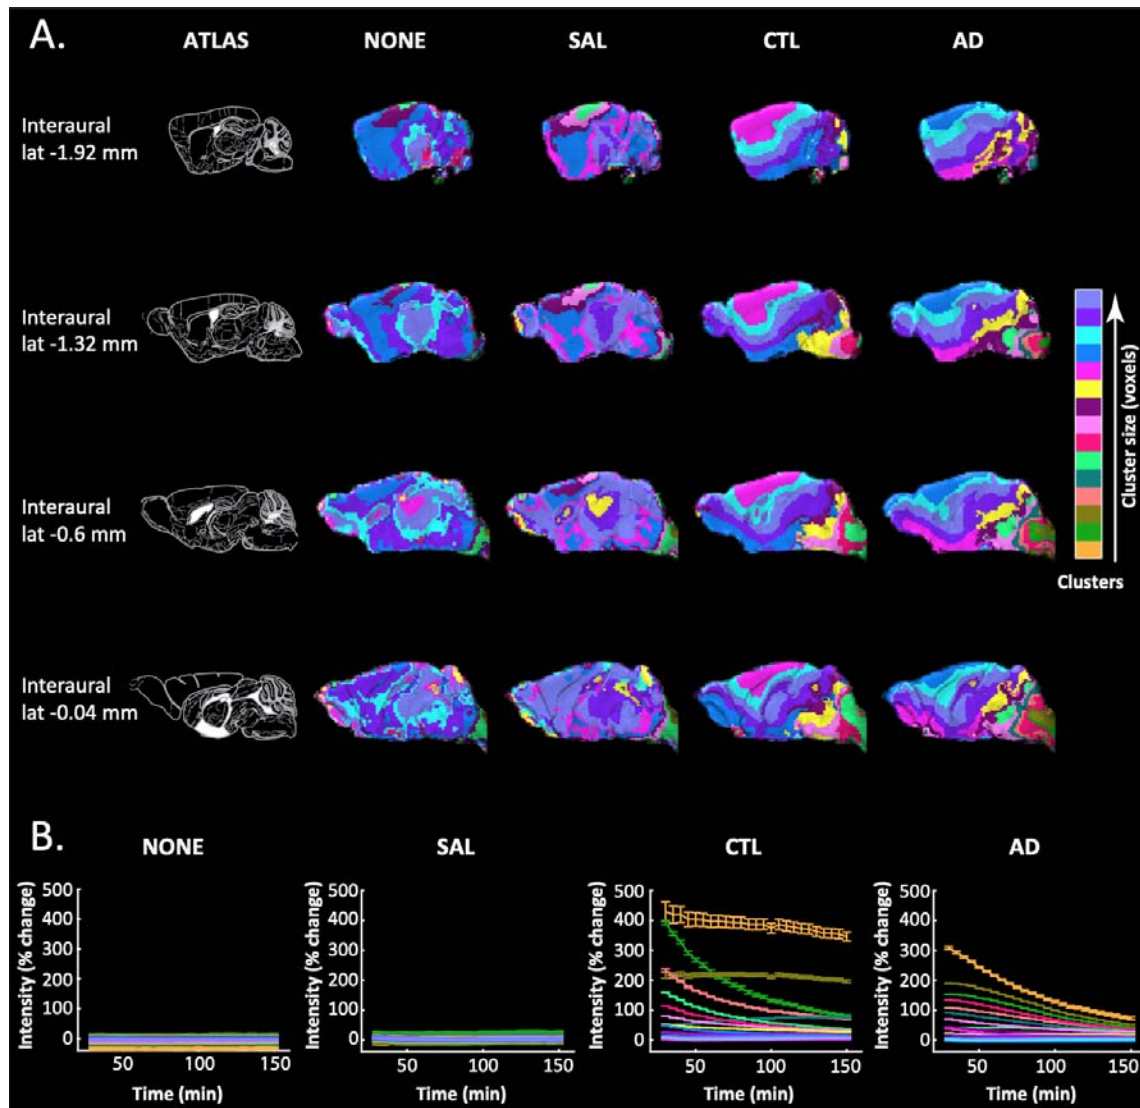

318

319 **Figure 4. Clustering of MRI voxel time-courses reflecting Gd-DOTA contrast agent distribution over**  
320 **time in the Tet-Off APP mouse model (AD) and three control groups: non-injected (NONE), saline-**  
321 **injected (SAL), and Gd-DOTA injected (CTL). A. On the leftmost column (ATLAS), sagittal planes from**  
322 **the Paxinos atlas at different interaural locations indicate four selected, representative brain slices. In**  
323 **other columns, the visualization of 15 clusters for each group (each cluster shown with a different**  
324 **colour) demonstrates brain areas that share similar distributions of contrast agent. Colours on the**  
325 **colour-bar indicate the sorting of clusters (in number of voxels) from smallest to largest in each group**  
326 **but note that same colours in different groups do not entail the same sizes and that it is not a linear**  
327 **scale but rather a sorted legend. B. The voxel-average time-courses (mean  $\pm$  SD) of each cluster are**

328 *shown for each group in the same colour as the respective cluster in A. Note that non-injected groups*  
329 *(NONE, SAL) show flat distributions of signal intensity over time that simply relate to slight signal*  
330 *amplitude differences without contrast agent contribution. On the other hand, injected groups*  
331 *demonstrated large increases in signal intensity starting at 30 min post-injection of Gd-DOTA (start of*  
332 *MRI acquisition) declining over time in most of the clusters (clearance of contrast agent) but also note*  
333 *the accumulation of contrast agent in a couple clusters.*

334 As expected by the absence of contrast agent, the clustering maps of the non-injected (NONE) and  
335 saline-injected (SAL) groups did not show a particular structure, but rather consisted of some very  
336 large homogeneous clusters and some smaller ones distributed randomly over the brain (Figure 4A).  
337 Moreover, as shown in Figure 4B, the time-courses for the SAL and NONE groups were approximately  
338 constant over time and close to 0% intensity change, essentially showing that the percent signal  
339 intensity change over time was minimal and much smaller in relation to the contrast injected groups.  
340 The small variability in the intensities of different clusters, approximately  $\pm 5\%$ , was used to guide the  
341 criterion for selecting clusters for further analysis in the injected groups, i.e., the clusters showing  
342 substantial intensity changes over time and thus reflecting changes in the distribution of contrast  
343 agent rather than simple signal variability (see Materials and Methods).

344 On the contrary to the NONE and the SAL groups, the CTL and AD groups that received intracisternal  
345 Gd-DOTA injections, displayed distinct clustering patterns. We could clearly observe a gradual  
346 spreading of the clusters from the posterior of the brain proximal to the cisterna magna towards the  
347 anterior of the brain and the olfactory bulb and dorsally towards the cortex (Figure 4A). Further, we  
348 noticed that for the AD group, the clusters proximal to the cisterna magna were more heterogeneous  
349 (fragmented) compared to the CTL. In addition, the time-courses of the clusters in the AD mice  
350 showed a delay in reaching the maximum peak compared to those in the CTL (Figure 4B).

351 ***The dynamics of CSF-ISF exchange are altered in the AD mice.***

352 Based on the obtained clustering maps and time curves, we sought in depth comparison between the  
353 AD and CTL mice to unravel differences in the dynamics and kinetics of CSF-ISF exchange. To this end,  
354 we selected clusters of interest from the CTL and AD groups based on a minimum size (in number of  
355 voxels) and peak intensity changes (see Materials and Methods section for selection criteria) and  
356 extracted their average time-courses (Figure 5A-D). Next, we extracted the time-courses from the  
357 same clusters in each animal and fitted them using a double exponential model with parameters  
358 representing the time constants for the inflow ( $\tau_{in}$ ) and the outflow ( $\tau_{out}$ ) of the Gd-DOTA. The group  
359 average time-courses and the corresponding fitting curves using the clusters from the CTL and AD  
360 groups are shown in Figure 5E (N=6) and 5F (N=10), respectively.

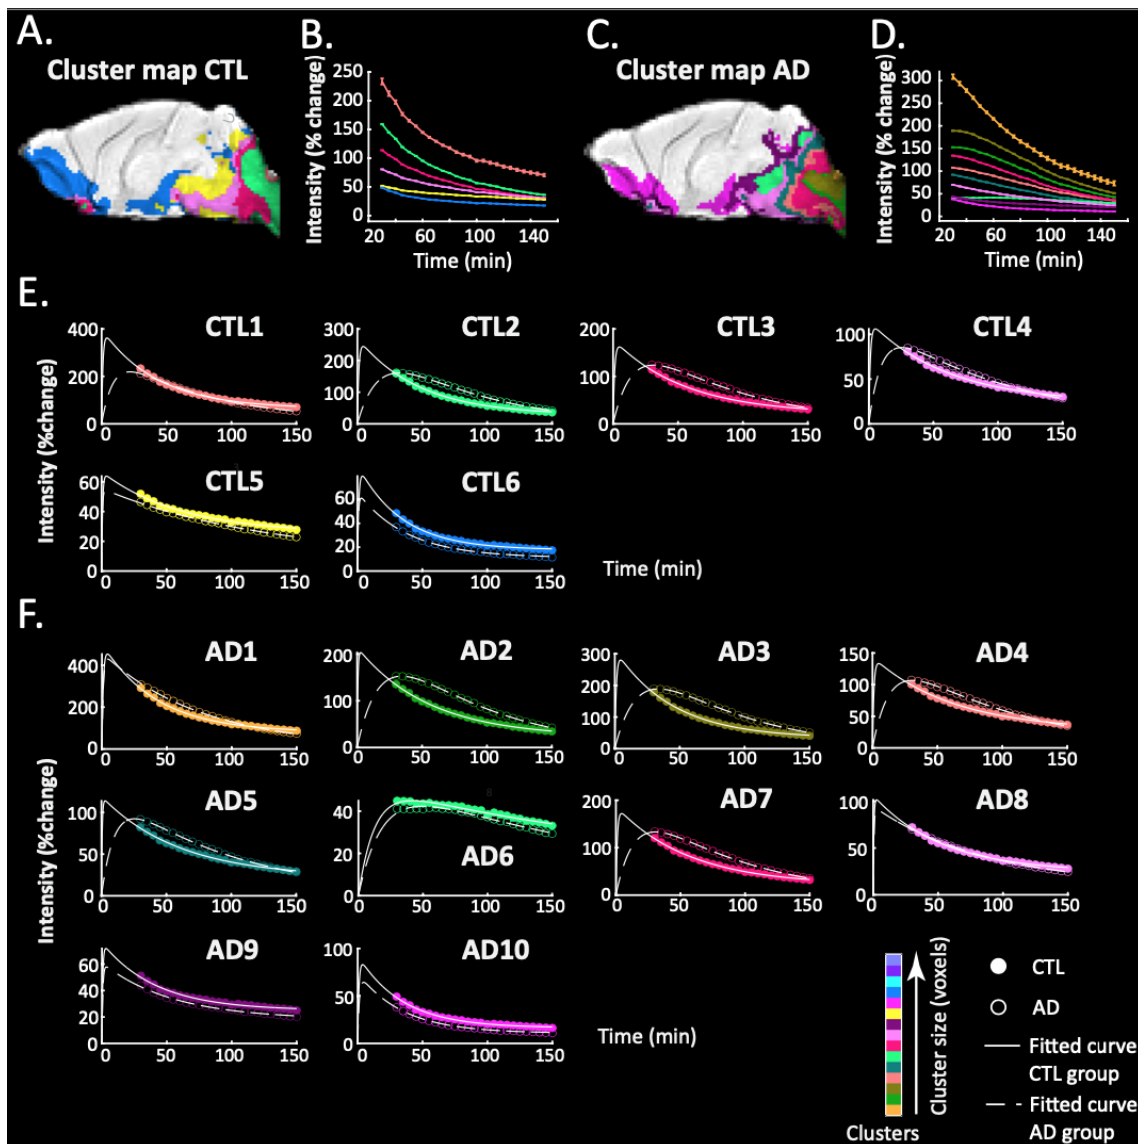

362 **Figure 5. Model-fitting of duster time-courses.** (A, C) Clusters of the CTL and AD groups respectively  
363 selected for further analysis based on a minimum signal-intensity change and minimum number of  
364 voxels criterion (see Materials and Methods). (B, D) Time-courses of the selected clusters in the CTL  
365 and AD group respectively. (E) Model-fitting of the time-courses of the selected clusters from the CTL  
366 group (solid lines, filled circles) is compared to model-fitting of the same cluster of voxels in the AD  
367 group (dashed lines, open circles). (F) Similarly, model-fitting of the selected clusters of the AD group  
368 (dashed lines, open circles) is compared to model-fitting of the same cluster of voxels in the CTL group  
369 (solid lines, closed circles). In each panel of E and F, lines demonstrate the model fit and circles the  
370 data points (also shown in B, D) for each cluster. Colours represent size sorting of the clusters based  
371 on the number of voxels (same as Fig. 4).

372 For the CTL based clusters (Fig. 5E), we noticed that those located in the vicinity of the injection site  
373 showed different profiles of data and fitted curves across the two groups (Fig. 5E; CTL1-4). While the  
374 CTL group curves were from the start of acquisition in the descending phase of signal intensity  
375 (representing the outflow of the Gd-DOTA), initial increases of signal intensity (representing inflow  
376 and accumulation of Gd-DOTA) were still occurring in the AD mice with signals reaching the  
377 maximum peak at later time points. Furthermore, the infiltration of Gd-DOTA into the brain  
378 parenchyma was significantly longer in the AD group. These observations were also consistent with  
379 the model fitted  $\tau_{in}$  time constants representing contrast agent inflow, which showed significant  
380 differences across the two groups (see  $\tau_{in}$  values of clusters CTL1-4 in Table 1). In contrast, two other  
381 clusters (CTL5 and CTL6), displayed similar patterns in both groups and no significant differences in  
382 the inflow were observed. Notably, in the case of the outflow time constant  $\tau_{out}$ , we found no  
383 significant differences between the AD mice and their CTL littermates for any of the CTL based  
384 clusters (Table 1).

385 **Table 1.** *p-values of the two-sample t-test performed on the time constants  $\tau_{in}$  and  $\tau_{out}$  representing*  
386 *the inflow and outflow of DOTAREM for the CTL-based clusters. \*, ( $p < 0.05$ ).*

| <i>Cluster</i> | <b>CTL1</b> | <b>CTL2</b> | <b>CTL3</b> | <b>CTL4</b> | <b>CTL5</b> | <b>CTL6</b> |
|----------------|-------------|-------------|-------------|-------------|-------------|-------------|
| $\tau_{in}$    | 0.0149*     | 0.0248*     | 0.0199*     | 0.0274*     | 0.1893      | 0.6197      |
| $\tau_{out}$   | 0.9047      | 0.2088      | 0.4702      | 0.9026      | 0.0955      | 0.6765      |

387 For the AD based clusters (Fig. 5F), even though their spatial distribution was different with more  
 388 clusters in total, a similar effect - namely the inflow of Gd-DOTA was significantly slower in the AD  
 389 mice - was observed particularly for those clusters in the vicinity of the injection site (Fig. 5F; AD2,3,4  
 390 & 7). This was also reflected in the statistics of the  $\tau_{in}$  and  $\tau_{out}$  time constants across the two groups  
 391 (Table 2). Note that AD5, which consisted of voxels surrounding the aforementioned clusters and  
 392 thus was receiving Gd-DOTA from them, also showed a statistical trend ( $p = 0.0563$ ) for a difference  
 393 in the inflow  $\tau_{in}$  parameter across the two groups. In analogy to the CTL clusters, the clearance  $\tau_{out}$  of  
 394 Gd-DOTA was similar between both groups with no significant differences in any cluster (see  $p$ -values  
 395 of  $\tau_{out}$  in Table 2).

396 **Table 2.**  $p$ -values of the two-sample  $t$ -test performed on the time constants ( $\tau$ ) for the inflow and the  
 397 outflow of the DOTAREM for the AD clusters. \*, ( $p < 0.05$ ), #, trend for statistical significance.

| <i>Cluster</i> | <b>AD1</b> | <b>AD2</b> | <b>AD3</b> | <b>AD4</b> | <b>AD5</b> | <b>AD6</b> | <b>AD7</b> | <b>AD8</b> | <b>AD9</b> | <b>AD10</b> |
|----------------|------------|------------|------------|------------|------------|------------|------------|------------|------------|-------------|
| $\tau_{in}$    | 0,2868     | 0,0209*    | 0,0204*    | 0,0327*    | 0,0563#    | 0,4011     | 0,0260*    | 0,1161     | 0,1541     | 0,6050      |
| $\tau_{out}$   | 0,5503     | 0,7787     | 0,2947     | 0,7097     | 0,4027     | 0,3415     | 0,8662     | 0,2634     | 0,1631     | 0,9691      |

### 398 **Altered glymphatic transport in AD mice is associated with brain pathology at the microscale**

399 To further clarify the observed differences in the dynamics of brain-fluid circulation in the AD group,  
 400 we have also performed an ex vivo histological assessment to assess microscale alterations in  
 401 multiple brain regions. To this end, we evaluated both the amyloid plaque burden (Thioflavin-S  
 402 staining) and the inflammatory responses, such as astrogliosis (GFAP staining) and microgliosis (Iba1  
 403 staining) (Figure 6A-C). Furthermore, we evaluated AQP4 colocalization with the blood vessels (Lectin  
 404 staining) (Figure 6D). A large amyloid plaque burden was observed throughout the brain of AD mice,  
 405 including hippocampus, cortex, olfactory bulb and amygdala, with no deposits present in the  
 406 cerebellum and the brainstem (Figure 6A), thereby consistent with the previously reported forebrain



407 parenchymal amyloidosis for this Tet-off APP mouse model (Jankowsky et al. 2005). In terms of  
408 inflammatory processes, extensive astrogliosis and microgliosis were clearly present in the brain of  
409 AD mice, with reactive microglia and astrocytes greatly surrounding the vicinity of dense-core  
410 amyloid plaques (Figure 6B-C). Notably, astrogliosis and microgliosis were also observed in brain  
411 regions devoid of plaques, suggesting the spread of inflammatory signalling throughout the whole  
412 brain of the AD mice. Despite extensive astrogliosis, vessel density was not altered and AQP4 seemed  
413 to remain colocalised along the blood vessels in AD mice, regardless of the brain areas (Figure 6D).

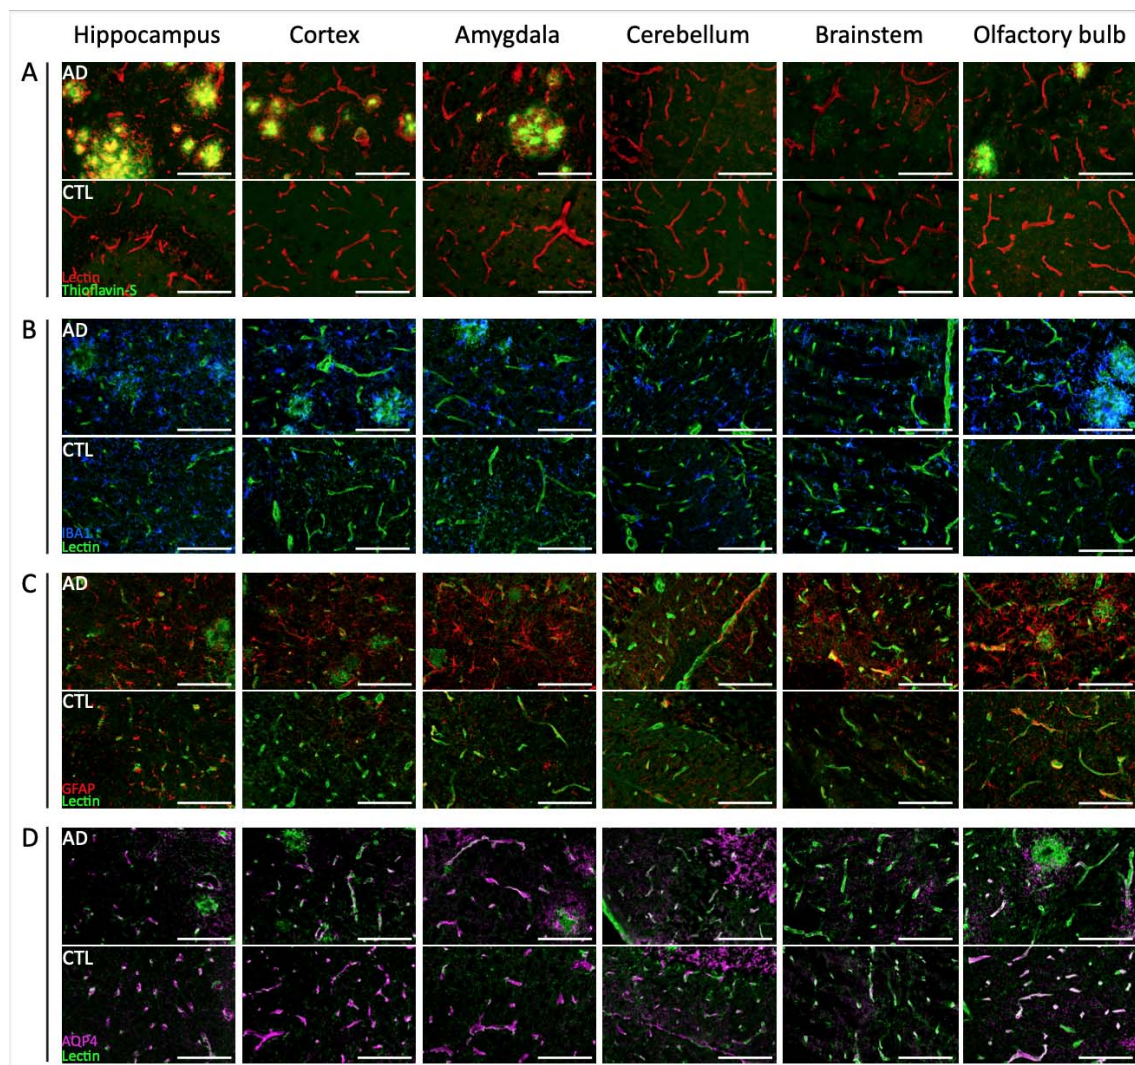

414

415 **Figure 6. Representative images of ex vivo evaluation of amyloid plaque load, inflammatory**  
416 **responses and AQP4 in the Tet-Off APP (AD) and control (CTL) mice within key brain regions**

417 ***hippocampus, cortex, amygdala, olfactory bulb, cerebellum and brainstem.*** A. Amyloid plaques  
418 *(green) stained with Thioflavin-S were detected in brain regions characteristic of the model, such as*  
419 *the hippocampus, the cortical areas and olfactory bulb. The vessels were labelled with lectin (red). B.*  
420 *Obvious sign of microgliosis (Iba1, blue) was observed surrounding the amyloid plaques and the*  
421 *surrounding tissue in the AD mice but not surrounding the vessels (lectin, green). C. AD mouse showed*  
422 *an accumulation of astrocytes (GFAP, red) surrounding the plaques, as well as the surrounding tissue*  
423 *and vessels (lectin, green) compared to control littermates, even in brain regions devoid of plaques*  
424 *(i.e., brainstem). D. AQP4 (magenta) is colocalised along the vessels (lectin, green) and its distribution*  
425 *does not seem to be different between both groups. Scale bar, 100  $\mu$ m.*

## 426 **DISCUSSION**

427 Driven by recent findings linking AD and ageing to CSF circulation and neuronal network dysfunction,  
428 we performed this DCE-MRI study in a mature-onset mouse model of amyloidosis mimicking  
429 late-onset AD (LOAD) in humans. Particularly, to avoid possible confounding factors caused by APP  
430 overexpression during brain postnatal development, we used 14-month-old Tet-Off APP (AD) mice in  
431 which APP overexpression, and thus transgenic A $\beta$  overproduction, was ‘turned-on’ at 3 months of  
432 age (‘mature’ adult) and compared their whole brain fluid circulation with non-plaque bearing  
433 control littermates.

434 We could demonstrate that AD mice and controls manifested clear and interesting divergence in  
435 their CSF-ISF exchange as captured by in vivo DCE-MRI (Figure 2, Figure 4). More specifically, we  
436 elucidated that the glymphatic transport of the Gd-DOTA tracer was considerably changed in AD  
437 mice compared to the control group with changes indicating a reduced and redirected flow (Figure  
438 2C). Notably, we observed that the AD group showed slower infiltration and time-to-peak, longer  
439 retention, and high accumulation of CSF tracer within caudal regions of the brain, such as the  
440 medulla and the pons (Figure 3D-E). This was even more evident while looking at the profiles of the  
441 time-courses for both groups (Figure 4), where for AD mice the clusters of regions placed in the

442 proximity of the injection side presented a delay in reaching the peak intensity compared to the  
443 controls that were already in the descending phase. Moreover, the modification of Gd-DOTA  
444 circulation was reflected in the differences of the inflow time constant  $\tau_n$  (see Tables 1 and 2) with  
445 evidently longer and slower parenchymal infiltration of CSF tracer for the AD group.

446 Recently, we reported that the same AD mice showed large deterioration of global functional  
447 networks as reflected in resting-state functional MRI measurements with reduced functional  
448 connectivity within and between regions of the default-mode network (DMN) at the post-plaque  
449 stage (Ben-Nejma et al. 2019). In a recent study in humans, Han and colleagues analysed multimodal  
450 data from the Alzheimer's Disease Neuroimaging Initiative (ADNI) and showed that the coupling  
451 between the global fMRI signal and CSF influx is correlated with AD pathology (Han et al. 2021). Thus,  
452 taken together, our findings from both studies are consistent with the work of Han and colleagues  
453 pointing towards mutual interactions between CSF flow and global brain activity in AD.

454 Our immunohistochemistry results in the AD mice showed wide-spread amyloidosis throughout  
455 several regions including cerebral cortex, hippocampus, olfactory bulb and amygdala, while  
456 cerebellum and brainstem remained free of amyloid- $\beta$  deposits. Altogether, we reasoned that the  
457 high abundance of amyloid- $\beta$  plaques across the forebrain of AD mice might have led to an  
458 obstruction and hindered the normal routes of CSF circulation within the cranial cavity. Previous  
459 studies demonstrated that blockage of normal routes can redirect and/or impair the CSF bulk flow  
460 (Peng et al. 2016; Wang et al. 2017; Ma et al. 2019). To this end, Ma and colleagues reported that  
461 after cisterna magna injection in glioma-bearing mice the CSF tracer was rerouted to the spine and  
462 spinal lymphatic outflow pathways due to the blockage of cranial CSF outflow routes (Ma et al.  
463 2019). Further, Wang and colleagues showed that CSF flow was halted in the hemisphere affected by  
464 multiple microinfarctions and was slowed on the contralateral side (Wang et al. 2017). Also, in the  
465 context of amyloidosis models mimicking early-onset AD (EOAD) in humans, the glymphatic transport  
466 was greatly reduced in old APP/PS1 mice (12-18 m) (Peng et al. 2016). Note that in those mice,



467 deposition of plaques begins at six weeks of age with amyloid- $\beta$  spreading into several regions  
468 including cortex, hippocampus, striatum, thalamus, cerebellum, brainstem and limitedly vessels  
469 (Radde et al. 2006). Peng and colleagues also showed a deleterious effect of circulating soluble A $\beta$ ,  
470 which when injected into wild-type mice suppressed the influx of CSF tracer into the cortex (Peng et  
471 al. 2016).

472 Consistent with our results, altered glymphatic transport was also observed in humans. It was shown  
473 that glymphatic clearance in AD patients was reduced (de Leon et al. 2017) and delayed compared to  
474 healthy controls, demonstrated by a higher signal retention (Ringstad et al. 2018). Further,  
475 cognitively affected patients with idiopathic normal pressure hydrocephalus also displayed a delayed  
476 clearance of CSF tracer from entorhinal cortex (Eide and Ringstad 2019).

477 Importantly, glymphatic system decline was also found upon normal ageing (Zhou et al. 2020)  
478 drawing attention to the effects of ageing on the neurodegenerative disorders. Kress and others  
479 elegantly demonstrated that not only glymphatic flow becomes dramatically reduced upon ageing  
480 (Kress et al. 2014), but CSF production and pressure decrease as well (May et al. 1990; Jessen et al.  
481 2015). This decrease in CSF flow is postulated to be linked to increase in vascular stiffness and  
482 reduced brain artery pulsation (Kress et al. 2014; Mestre et al. 2017; Mestre, Hablitz, et al. 2018;  
483 Benveniste et al. 2019). Moreover, ageing was also associated with worse sleep quality (Mander,  
484 Winer, and Walker 2017), which in turn is linked to increased A $\beta$  levels (Varga, Wohlleber, et al.  
485 2016). In fact, sleep disruption is correlated to an increased A $\beta$  deposition (Ju et al. 2013) and  
486 connected to cognitive dysfunction (Varga, Ducca, et al. 2016).

487 Noteworthy, during ageing not only glymphatic but also interconnected cerebral lymphatic network  
488 undergoes deterioration resulting in severely impaired drainage towards peripheral lymph nodes (Da  
489 Mesquita et al. 2021; Ma et al. 2017). Indicatively, studies performed in 5xFAD mice (an EOAD mouse  
490 model) showed that disruption of meningeal lymphatic vessels in younger animals (5-6 m) led to  
491 exacerbation of disease with observed increase in A $\beta$  deposition and reduced extracellular clearance

492 (Da Mesquita et al. 2018). More recently, the same authors demonstrated that in aged mice (13-14  
493 m) deterioration of lymphatic vasculature was also observed (Da Mesquita et al. 2021). These 5xFAD  
494 mice rapidly develop amyloid pathology with plaque deposition starting around two months and  
495 spreading throughout cortex, hippocampus, thalamus, olfactory bulb and brainstem and even the  
496 spinal cord, but being absent in cerebellum. Although not assessed in our current studies, it would be  
497 interesting to explore also this glymphatic-lymphatic axis in Tet-Off APP mouse model using more  
498 sensitive tools, particularly in view that we did not observe significant difference in the outflow time  
499 constant  $\tau_{out}$  between AD and control mice (Table 1&2). We conjecture that this might be related to  
500 the above discussed impact of ageing on vasculature, efficacy of (g)lymphatic system and CSF  
501 production in our middle-aged mice making either a difference in  $\tau_{out}$  between both groups negligible  
502 and/or being beyond the detectability levels by MRI.

503 Furthermore, we speculate that changes in the glymphatic flow of AD mice may be in part related to  
504 astrocyte changes given that an extensive astrogliosis was observed, not only in the vicinity of  
505 amyloid- $\beta$  deposits, but throughout the brain and also in regions devoid of lesions such as the  
506 brainstem (Figure 6C). Astrocytes are believed to be key players in the modulation of CSF-ISF  
507 exchange facilitated by AQP4 water channel at the astrocytic end-feet (Iliff et al. 2012; Mestre,  
508 Hablitz, et al. 2018; Hablitz et al. 2019; Harrison et al. 2020). Deletion of AQP4 in middle-aged  
509 APP/PS1 mice (12 m) increased amyloid- $\beta$  accumulation, vascular amyloidosis and aggravated  
510 cognitive deficits (Xu et al. 2015). The perivascular localization and expression of AQP4, required for  
511 efficient CSF-ISF exchange, was shown to decline with age (Kress et al. 2014), and in AD patients  
512 AQP4 polarization was associated with disease stage (Zeppenfeld et al. 2017). In addition, the extent  
513 of vascular amyloidosis in EOAD murine models was closely correlated with astrocyte polarization  
514 (Yang et al. 2011; Kimbrough et al. 2015). In view of the aforementioned literature and the wide-  
515 spread astrogliosis in our AD mice with high levels of GFAP-positive astrocytes in regions of high A $\beta$   
516 burden, the changes in AQP4 polarization and coverage between both groups would be intuitively  
517 expected. However, our sample size and experimental outcome were not sufficient to draw currently

518 reliable conclusions in this regard (Figure 6E). Moreover, astrogliosis is a process via which astrocytes  
519 react to different forms of neuropathology like A $\beta$  insult when astrocyte functions are altered  
520 (Zlokovic 2011; Kimbrough et al. 2015). Thus, while healthy astrocytes play a vital role in neuro-glia-  
521 vascular unit by connecting the vasculature to neurons to ensure neuronal communication and  
522 energy demands (Iadecola and Nedergaard 2007), the astrogliosis contributes to pathology of AD by  
523 loss of astrocytes normal function and toxic effects (Zlokovic 2011). To this end, the loss of astrocyte  
524 polarization was suggested to be a consequence rather than a cause of A $\beta$ -deposition with observed  
525 impairment of gliovascular coupling (Kimbrough et al. 2015). Additionally, we have demonstrated the  
526 effects of soluble A $\beta$  on the resting-state neuronal networks at the pre-plaque stage and thus  
527 preceding the reactive astrogliosis observed in the presence of wide-spread amyloid plaque  
528 deposition (Ben-Nejma et al. 2019).

529 While it is still impossible to establish to what extent disruption in global brain activity and CSF  
530 circulation-drainage play a role in the initiation of AD pathology, we believe that a bidirectionally  
531 detrimental influence is the most likely scenario and should be carefully considered by combining  
532 different models and tools. This becomes particularly important in view of recent exciting studies  
533 that indicated to possible cognitive improvement by decreasing A $\beta$  load either via combining halted  
534 APP overexpression and immunotherapy in Tet-Off APP mice (Chiang et al. 2018), or using targeted  
535 enhancement of (g)lymphatic CSF-lymphatic clearance in 5xFAD mice (Lee et al. 2020; Da Mesquita  
536 et al. 2021; Lin et al. 2021).

## 537 **CONCLUSIONS**

538 To conclude, in our studies we chose to investigate Tet-Off APP mice and control littermates to be  
539 able to access and dissociate the effects of pathology and ageing on the global efficacy of CSF-ISF  
540 exchange in the context of neuronal network dysfunction, at a time point mimicking advanced stage  
541 LOAD. It would be very interesting to further extend these studies by choosing different mouse-age  
542 regimes for APP expression, in analogy to the work of Jankowsky and colleagues (Wang et al. 2011),

543 and/or transgenic models overproducing A $\beta$  with APP expressed at physiological levels. Given the  
544 interesting experimental outcome, we envision it will be highly valuable to perform future studies of  
545 the glymphatic-lymphatic axis in relation to network dysfunctions in neurodegenerative disorders  
546 both at the whole brain scale by MRI as well as at the microscale by immunohistochemistry and  
547 other techniques. Such studies will allow a closer look on the effects of amyloid beta on brain fluid  
548 circulation and the link to brain network dysfunctions.

549

## 550 **ABBREVIATIONS**

551 A $\beta$ : amyloid-beta

552 AD: Alzheimer's disease

553 ANTs: Advanced Normalization Tools

554 APP: amyloid precursor protein

555 AQP4: aquaporin-4

556 AUC: area under the curve

557 CamKII $\alpha$ : calmodulin-dependent protein kinase type II alpha chain

558 CB: cerebellum

559 CM: cisterna magna

560 CSF: cerebrospinal fluid

561 CTL: control

562 DCE-MRI: dynamic contrast-enhanced magnetic resonance imaging

563 DMN: default mode (like) network

564 DOX: doxycycline

565 EOAD: early-onset of Alzheimer's disease

566 Gd: gadolinium

567 Gd-DOTA: gadoteric acid

- 568 GS: glymphatic system
- 569 Gcv: cerebral vein of Galen
- 570 HC: hippocampus
- 571 ISF: interstitial fluid
- 572 LOAD: late-onset of Alzheimer's disease
- 573 MREG: magnetic resonance encephalography
- 574 NONE: non-injected
- 575 NREM: non-rapid eye movement
- 576 NTg: non-transgene carrier
- 577 OB: olfactory bulb
- 578 OlfA: olfactory artery
- 579 PCA: principal component analysis
- 580 Rrhv: rostral rhinal vein
- 581 SAL: saline
- 582 Sss: superior sagittal sinus
- 583 Trs: transverse sinus
- 584 ROI: region-of-interest
- 585 rsfMRI: resting-state functional magnetic resonance imaging
- 586 tetO: tetracycline-responsive
- 587 tTA: tetracycline-Transactivator

588 **DECLARATIONS**

589 **ETHICS APPROVAL**

- 590 All experiments were approved and performed in strict accordance with the European Directive
- 591 2010/63/EU on the protection of animals used for scientific purposes. The protocols were approved

592 by the Committee on Animal Care and Use at the University of Antwerp, Belgium (permit number  
593 2014–76).

#### 594 **CONSENT FOR PUBLICATION**

595 Not applicable

#### 596 **AVAILABILITY OF DATA AND MATERIALS**

597 Raw data and images are available upon reasonable request from the corresponding authors.

#### 598 **COMPETING INTERESTS**

599 The authors declare that they have no competing interests

#### 600 **FUNDING**

601 This study was supported by the Fund for Scientific Research Flanders (FWO) (grant agreements  
602 G067515N to AVdL, and G048917N to GAK). The 9.4T Bruker MR system was in part funded by the  
603 Flemish Impulse funding for heavy scientific equipment (42/FA010100/123) to AVdL).

#### 604 **AUTHORS' CONTRIBUTIONS**

605 IBN, AJK, AVdL and GAK conceived and designed the study. IBN performed the surgeries, MRI and  
606 optical images data acquisition. IBN, GAK analysed MRI data. GAK developed scripts and pipeline  
607 used for MRI data processing, analysis and supervised MRI data analysis. VV, IBN, AJK contributed to  
608 MRI sequence adjustment. VV and IBN did the MRI data pre-processing. AJK, IBN, PP developed  
609 protocols and contributed to ex-vivo immunostaining studies. AJK supervised all aspects of the daily  
610 work and performed data interpretation. IBN, AJK, GAK prepared figures and wrote the manuscript.  
611 All authors read, edited and approved the final version of the manuscript.

## 612 ACKNOWLEDGEMENTS

613 The authors thank to Prof. Dr. Joanna L. Jankowsky (Baylor College of Medicine, Houston, Texas,  
614 United States) and Prof. Dr. JoAnne McLaurin (Sunnybrook Health Sciences Centre, Toronto, Canada)  
615 for providing single transgenic tTA and APP male mice. We also express our gratitude to Dr. Jelle  
616 Praet for initial help in establishing and managing mouse colonies. We are indebted to Jasmijn Daans  
617 for help in performing immunostaining experiments. We thank other members of Bioimaging lab,  
618 Johan Van Auderkerke for technical support and Prof. Marleen Verhoye for initial technical  
619 suggestions and discussion during meetings. The computational resources and services used in this  
620 work were provided by the HPC core facility CalcUA of the Universiteit Antwerpen, the VSC (Flemish  
621 Supercomputer Center), funded by the Hercules Foundation and the Flemish Government –  
622 department EWI.

## 623 REFERENCES

- 624 Aspelund, A., S. Antila, S. T. Proulx, T. V. Karlsen, S. Karaman, M. Detmar, H. Wiig, and K.  
625 Alitalo. 2015. 'A dural lymphatic vascular system that drains brain interstitial fluid and  
626 macromolecules', *J Exp Med*, 212: 991-9.
- 627 Badhwar, A., A. Tam, C. Dansereau, P. Orban, F. Hoffstaedter, and P. Bellec. 2017. 'Resting-  
628 state network dysfunction in Alzheimer's disease: A systematic review and meta-  
629 analysis', *Alzheimers Dement (Amst)*, 8: 73-85.
- 630 Ben-Nejma, I. R. H., A. J. Keliris, J. Daans, P. Ponsaerts, M. Verhoye, A. Van der Linden,  
631 and G. A. Keliris. 2019. 'Increased soluble amyloid-beta causes early aberrant brain  
632 network hypersynchronisation in a mature-onset mouse model of amyloidosis', *Acta  
633 Neuropathol Commun*, 7: 180.
- 634 Benveniste, H., X. Liu, S. Koundal, S. Sanggaard, H. Lee, and J. Wardlaw. 2019. 'The  
635 Glymphatic System and Waste Clearance with Brain Aging: A Review', *Gerontology*,  
636 65: 106-19.
- 637 Chiang, A. C. A., S. W. Fowler, R. R. Savjani, S. G. Hilsenbeck, C. E. Wallace, J. R. Cirrito,  
638 P. Das, and J. L. Jankowsky. 2018. 'Combination anti-Abeta treatment maximizes  
639 cognitive recovery and rebalances mTOR signaling in APP mice', *J Exp Med*, 215:  
640 1349-64.
- 641 Da Mesquita, S., A. Louveau, A. Vaccari, I. Smirnov, R. C. Cornelison, K. M. Kingsmore, C.  
642 Contarino, S. Onengut-Gumuscu, E. Farber, D. Raper, K. E. Viar, R. D. Powell, W.  
643 Baker, N. Dabhi, R. Bai, R. Cao, S. Hu, S. S. Rich, J. M. Munson, M. B. Lopes, C. C.  
644 Overall, S. T. Acton, and J. Kipnis. 2018. 'Functional aspects of meningeal lymphatics  
645 in ageing and Alzheimer's disease', *Nature*, 560: 185-91.
- 646 Da Mesquita, S., Z. Papadopoulos, T. Dykstra, L. Brase, F. G. Farias, M. Wall, H. Jiang, C.  
647 D. Kodira, K. A. de Lima, J. Herz, A. Louveau, D. H. Goldman, A. F. Salvador, S.

- 648 Onengut-Gumuscu, E. Farber, N. Dabhi, T. Kennedy, M. G. Milam, W. Baker, I.  
649 Smirnov, S. S. Rich, Network Dominantly Inherited Alzheimer, B. A. Benitez, C. M.  
650 Karch, R. J. Perrin, M. Farlow, J. P. Chhatwal, D. M. Holtzman, C. Cruchaga, O.  
651 Harari, and J. Kipnis. 2021. 'Meningeal lymphatics affect microglia responses and  
652 anti-Abeta immunotherapy', *Nature*, 593: 255-60.
- 653 de Leon, M. J., Y. Li, N. Okamura, W. H. Tsui, L. A. Saint-Louis, L. Glodzik, R. S. Osorio, J.  
654 Fortea, T. Butler, E. Pirraglia, S. Fossati, H. J. Kim, R. O. Carare, M. Nedergaard, H.  
655 Benveniste, and H. Rusinek. 2017. 'Cerebrospinal Fluid Clearance in Alzheimer  
656 Disease Measured with Dynamic PET', *J Nucl Med*, 58: 1471-76.
- 657 Dubois, B., H. Hampel, H. H. Feldman, P. Scheltens, P. Aisen, S. Andrieu, H. Bakardjian, H.  
658 Benali, L. Bertram, K. Blennow, K. Broich, E. Cavado, S. Crutch, J. F. Dartigues, C.  
659 Duyckaerts, S. Epelbaum, G. B. Frisoni, S. Gauthier, R. Genthon, A. A. Gouw, M. O.  
660 Habert, D. M. Holtzman, M. Kivipelto, S. Lista, J. L. Molinuevo, S. E. O'Bryant, G.  
661 D. Rabinovici, C. Rowe, S. Salloway, L. S. Schneider, R. Sperling, M. Teichmann, M.  
662 C. Carrillo, J. Cummings, C. R. Jack, Jr., Group Proceedings of the Meeting of the  
663 International Working, A. D. the American Alzheimer's Association on "The  
664 Preclinical State of, July, and U. S. A. Washington Dc. 2016. 'Preclinical Alzheimer's  
665 disease: Definition, natural history, and diagnostic criteria', *Alzheimers Dement*, 12:  
666 292-323.
- 667 Eide, P. K., and G. Ringstad. 2019. 'Delayed clearance of cerebrospinal fluid tracer from  
668 entorhinal cortex in idiopathic normal pressure hydrocephalus: A glymphatic magnetic  
669 resonance imaging study', *J Cereb Blood Flow Metab*, 39: 1355-68.
- 670 Feng, W., Y. Zhang, Z. Wang, H. Xu, T. Wu, C. Marshall, J. Gao, and M. Xiao. 2020.  
671 'Microglia prevent beta-amyloid plaque formation in the early stage of an Alzheimer's  
672 disease mouse model with suppression of glymphatic clearance', *Alzheimers Res Ther*,  
673 12: 125.
- 674 Fultz, N. E., G. Bonmassar, K. Setsompop, R. A. Stickgold, B. R. Rosen, J. R. Polimeni, and  
675 L. D. Lewis. 2019. 'Coupled electrophysiological, hemodynamic, and cerebrospinal  
676 fluid oscillations in human sleep', *Science*, 366: 628-31.
- 677 Gaberel, T., C. Gakuba, R. Goulay, S. Martinez De Lizarrondo, J. L. Hanouz, E. Emery, E.  
678 Touze, D. Vivien, and M. Gauberti. 2014. 'Impaired glymphatic perfusion after strokes  
679 revealed by contrast-enhanced MRI: a new target for fibrinolysis?', *Stroke*, 45: 3092-6.
- 680 Gakuba, C., T. Gaberel, S. Goursaud, J. Bourges, C. Di Palma, A. Quenault, S. Martinez de  
681 Lizarrondo, D. Vivien, and M. Gauberti. 2018. 'General Anesthesia Inhibits the  
682 Activity of the "Glymphatic System"', *Theranostics*, 8: 710-22.
- 683 Grandjean, J., R. Derungs, L. Kulic, T. Welt, M. Henkelman, R. M. Nitsch, and M. Rudin.  
684 2016. 'Complex interplay between brain function and structure during cerebral  
685 amyloidosis in APP transgenic mouse strains revealed by multi-parametric MRI  
686 comparison', *Neuroimage*, 134: 1-11.
- 687 Greicius, M. D., G. Srivastava, A. L. Reiss, and V. Menon. 2004. 'Default-mode network  
688 activity distinguishes Alzheimer's disease from healthy aging: evidence from  
689 functional MRI', *Proc Natl Acad Sci U S A*, 101: 4637-42.
- 690 Hablitz, L. M., H. S. Vinitsky, Q. Sun, F. F. Staeger, B. Sigurdsson, K. N. Mortensen, T. O.  
691 Lilius, and M. Nedergaard. 2019. 'Increased glymphatic influx is correlated with high  
692 EEG delta power and low heart rate in mice under anesthesia', *Sci Adv*, 5: eaav5447.
- 693 Han, F., J. Chen, A. Belkin-Rosen, Y. Gu, L. Luo, O. M. Buxton, X. Liu, and Initiative  
694 Alzheimer's Disease Neuroimaging. 2021. 'Reduced coupling between cerebrospinal  
695 fluid flow and global brain activity is linked to Alzheimer disease-related pathology',  
696 *PLoS Biol*, 19: e3001233.



- 697 Harrison, I. F., O. Ismail, A. Machhada, N. Colgan, Y. Ohene, P. Nahavandi, Z. Ahmed, A.  
698 Fisher, S. Meftah, T. K. Murray, O. P. Ottersen, E. A. Nagelhus, M. J. O'Neill, J. A.  
699 Wells, and M. F. Lythgoe. 2020. 'Impaired glymphatic function and clearance of tau in  
700 an Alzheimer's disease model', *Brain*, 143: 2576-93.
- 701 Hinz, Rukun, Meriam Malekzadeh, Lore M. Peeters, Verdi Vanreusel, Marleen Verhoye,  
702 Annemie Van der Linden, and Georgios A. Keliris. 2021. 'An in-vivo digital atlas of  
703 the spatially reliable cerebral vasculature in mice', *bioRxiv*: 2021.10.21.465264.
- 704 Hladky, S. B., and M. A. Barrand. 2018. 'Elimination of substances from the brain  
705 parenchyma: efflux via perivascular pathways and via the blood-brain barrier', *Fluids  
706 Barriers CNS*, 15: 30.
- 707 Iadecola, C., and M. Nedergaard. 2007. 'Glial regulation of the cerebral microvasculature',  
708 *Nat Neurosci*, 10: 1369-76.
- 709 Iliff, J. J., M. J. Chen, B. A. Plog, D. M. Zeppenfeld, M. Soltero, L. Yang, I. Singh, R. Deane,  
710 and M. Nedergaard. 2014. 'Impairment of glymphatic pathway function promotes tau  
711 pathology after traumatic brain injury', *J Neurosci*, 34: 16180-93.
- 712 Iliff, J. J., H. Lee, M. Yu, T. Feng, J. Logan, M. Nedergaard, and H. Benveniste. 2013. 'Brain-  
713 wide pathway for waste clearance captured by contrast-enhanced MRI', *J Clin Invest*,  
714 123: 1299-309.
- 715 Iliff, J. J., M. Wang, Y. Liao, B. A. Plogg, W. Peng, G. A. Gundersen, H. Benveniste, G. E.  
716 Vates, R. Deane, S. A. Goldman, E. A. Nagelhus, and M. Nedergaard. 2012. 'A  
717 paravascular pathway facilitates CSF flow through the brain parenchyma and the  
718 clearance of interstitial solutes, including amyloid beta', *Sci Transl Med*, 4: 147ra11.
- 719 Iliff, J. J., M. Wang, D. M. Zeppenfeld, A. Venkataraman, B. A. Plog, Y. Liao, R. Deane, and  
720 M. Nedergaard. 2013. 'Cerebral arterial pulsation drives paravascular CSF-interstitial  
721 fluid exchange in the murine brain', *J Neurosci*, 33: 18190-9.
- 722 Jankowsky, J. L., H. H. Slunt, V. Gonzales, A. V. Savonenko, J. C. Wen, N. A. Jenkins, N. G.  
723 Copeland, L. H. Younkin, H. A. Lester, S. G. Younkin, and D. R. Borchelt. 2005.  
724 'Persistent amyloidosis following suppression of Abeta production in a transgenic  
725 model of Alzheimer disease', *PLoS Med*, 2: e355.
- 726 Jankowsky, J. L., and H. Zheng. 2017. 'Practical considerations for choosing a mouse model  
727 of Alzheimer's disease', *Mol Neurodegener*, 12: 89.
- 728 Jessen, N. A., A. S. Munk, I. Lundgaard, and M. Nedergaard. 2015. 'The Glymphatic System:  
729 A Beginner's Guide', *Neurochem Res*, 40: 2583-99.
- 730 Ju, Y. E., J. S. McLeland, C. D. Toedebusch, C. Xiong, A. M. Fagan, S. P. Duntley, J. C.  
731 Morris, and D. M. Holtzman. 2013. 'Sleep quality and preclinical Alzheimer disease',  
732 *JAMA Neurol*, 70: 587-93.
- 733 Kimbrough, I. F., S. Robel, E. D. Roberson, and H. Sontheimer. 2015. 'Vascular amyloidosis  
734 impairs the gliovascular unit in a mouse model of Alzheimer's disease', *Brain*, 138:  
735 3716-33.
- 736 Kiviniemi, V., X. Wang, V. Korhonen, T. Keinanen, T. Tuovinen, J. Autio, P. LeVan, S.  
737 Keilholz, Y. F. Zang, J. Hennig, and M. Nedergaard. 2016. 'Ultra-fast magnetic  
738 resonance encephalography of physiological brain activity - Glymphatic pulsation  
739 mechanisms?', *J Cereb Blood Flow Metab*, 36: 1033-45.
- 740 Kress, B. T., J. J. Iliff, M. Xia, M. Wang, H. S. Wei, D. Zeppenfeld, L. Xie, H. Kang, Q. Xu,  
741 J. A. Liew, B. A. Plog, F. Ding, R. Deane, and M. Nedergaard. 2014. 'Impairment of  
742 paravascular clearance pathways in the aging brain', *Ann Neurol*, 76: 845-61.
- 743 Lee, Y., Y. Choi, E. J. Park, S. Kwon, H. Kim, J. Y. Lee, and D. S. Lee. 2020. 'Improvement  
744 of glymphatic-lymphatic drainage of beta-amyloid by focused ultrasound in  
745 Alzheimer's disease model', *Sci Rep*, 10: 16144.

- 746 Lin, Y., J. Jin, R. Lv, Y. Luo, W. Dai, W. Li, Y. Tang, Y. Wang, X. Ye, and W. J. Lin. 2021.  
747 'Repetitive transcranial magnetic stimulation increases the brain's drainage efficiency  
748 in a mouse model of Alzheimer's disease', *Acta Neuropathol Commun*, 9: 102.
- 749 Lloret, M. A., A. Cervera-Ferri, M. Nepomuceno, P. Monllor, D. Esteve, and A. Lloret. 2020.  
750 'Is Sleep Disruption a Cause or Consequence of Alzheimer's Disease? Reviewing Its  
751 Possible Role as a Biomarker', *Int J Mol Sci*, 21.
- 752 Long, J. M., and D. M. Holtzman. 2019. 'Alzheimer Disease: An Update on Pathobiology and  
753 Treatment Strategies', *Cell*, 179: 312-39.
- 754 Louveau, A., B. A. Plog, S. Antila, K. Alitalo, M. Nedergaard, and J. Kipnis. 2017.  
755 'Understanding the functions and relationships of the glymphatic system and  
756 meningeal lymphatics', *J Clin Invest*, 127: 3210-19.
- 757 Ma, Q., B. V. Ineichen, M. Detmar, and S. T. Proulx. 2017. 'Outflow of cerebrospinal fluid is  
758 predominantly through lymphatic vessels and is reduced in aged mice', *Nat Commun*,  
759 8: 1434.
- 760 Ma, Q., F. Schlegel, S. B. Bachmann, H. Schneider, Y. Decker, M. Rudin, M. Weller, S. T.  
761 Proulx, and M. Detmar. 2019. 'Lymphatic outflow of cerebrospinal fluid is reduced in  
762 glioma', *Sci Rep*, 9: 14815.
- 763 Mander, B. A., J. R. Winer, and M. P. Walker. 2017. 'Sleep and Human Aging', *Neuron*, 94:  
764 19-36.
- 765 May, C., J. A. Kaye, J. R. Atack, M. B. Schapiro, R. P. Friedland, and S. I. Rapoport. 1990.  
766 'Cerebrospinal fluid production is reduced in healthy aging', *Neurology*, 40: 500-3.
- 767 Mestre, H., L. M. Hablitz, A. L. Xavier, W. Feng, W. Zou, T. Pu, H. Monai, G. Murlidharan,  
768 R. M. Castellanos Rivera, M. J. Simon, M. M. Pike, V. Pla, T. Du, B. T. Kress, X.  
769 Wang, B. A. Plog, A. S. Thrane, I. Lundgaard, Y. Abe, M. Yasui, J. H. Thomas, M.  
770 Xiao, H. Hirase, A. Asokan, J. J. Iliff, and M. Nedergaard. 2018. 'Aquaporin-4-  
771 dependent glymphatic solute transport in the rodent brain', *Elife*, 7.
- 772 Mestre, H., S. Kostrikov, R. I. Mehta, and M. Nedergaard. 2017. 'Perivascular spaces,  
773 glymphatic dysfunction, and small vessel disease', *Clin Sci (Lond)*, 131: 2257-74.
- 774 Mestre, H., Y. Mori, and M. Nedergaard. 2020. 'The Brain's Glymphatic System: Current  
775 Controversies', *Trends Neurosci*, 43: 458-66.
- 776 Mestre, H., J. Tithof, T. Du, W. Song, W. Peng, A. M. Sweeney, G. Olveda, J. H. Thomas, M.  
777 Nedergaard, and D. H. Kelley. 2018. 'Flow of cerebrospinal fluid is driven by arterial  
778 pulsations and is reduced in hypertension', *Nat Commun*, 9: 4878.
- 779 Oblak, A. L., P. B. Lin, K. P. Kotredes, R. S. Pandey, D. Garceau, H. M. Williams, A. Uyar,  
780 R. O'Rourke, S. O'Rourke, C. Ingraham, D. Bednarczyk, M. Belanger, Z. A. Cope, G.  
781 J. Little, S. G. Williams, C. Ash, A. Bleckert, T. Ragan, B. A. Logsdon, L. M.  
782 Mangravite, S. J. Sukoff Rizzo, P. R. Territo, G. W. Carter, G. R. Howell, M. Sasner,  
783 and B. T. Lamb. 2021. 'Comprehensive Evaluation of the 5XFAD Mouse Model for  
784 Preclinical Testing Applications: A MODEL-AD Study', *Front Aging Neurosci*, 13:  
785 713726.
- 786 Peng, W., T. M. Achariyar, B. Li, Y. Liao, H. Mestre, E. Hitomi, S. Regan, T. Kasper, S.  
787 Peng, F. Ding, H. Benveniste, M. Nedergaard, and R. Deane. 2016. 'Suppression of  
788 glymphatic fluid transport in a mouse model of Alzheimer's disease', *Neurobiol Dis*,  
789 93: 215-25.
- 790 Querfurth, H. W., and F. M. LaFerla. 2010. 'Alzheimer's disease', *N Engl J Med*, 362: 329-44.
- 791 Radde, R., T. Bolmont, S. A. Kaeser, J. Coomaraswamy, D. Lindau, L. Stoltze, M. E.  
792 Calhoun, F. Jaggi, H. Wolburg, S. Gengler, C. Haass, B. Ghetti, C. Czech, C.  
793 Holscher, P. M. Mathews, and M. Jucker. 2006. 'Abeta42-driven cerebral amyloidosis  
794 in transgenic mice reveals early and robust pathology', *EMBO Rep*, 7: 940-6.

- 795 Ringstad, G., L. M. Valnes, A. M. Dale, A. H. Pripp, S. S. Vatnehol, K. E. Emblem, K. A.  
796 Mardal, and P. K. Eide. 2018. 'Brain-wide glymphatic enhancement and clearance in  
797 humans assessed with MRI', *JCI Insight*, 3.
- 798 Shah, D., E. Jonckers, J. Praet, G. Vanhoutte, Y. Palacios R. Delgado, C. Bigot, D. V.  
799 D'Souza, M. Verhoye, and A. Van der Linden. 2013. 'Resting state fMRI reveals  
800 diminished functional connectivity in a mouse model of amyloidosis', *PLoS One*, 8:  
801 e84241.
- 802 Soto-Rojas, L. O., M. Pacheco-Herrero, P. A. Martinez-Gomez, B. B. Campa-Cordoba, R.  
803 Apatiga-Perez, M. M. Villegas-Rojas, C. R. Harrington, F. de la Cruz, L. Garces-  
804 Ramirez, and J. Luna-Munoz. 2021. 'The Neurovascular Unit Dysfunction in  
805 Alzheimer's Disease', *Int J Mol Sci*, 22.
- 806 Sri, S., C. M. Pegasiou, C. A. Cave, K. Hough, N. Wood, D. Gomez-Nicola, K. Deinhardt, D.  
807 Bannerman, V. H. Perry, and M. Vargas-Caballero. 2019. 'Emergence of synaptic and  
808 cognitive impairment in a mature-onset APP mouse model of Alzheimer's disease',  
809 *Acta Neuropathol Commun*, 7: 25.
- 810 Tarasoff-Conway, J. M., R. O. Carare, R. S. Osorio, L. Glodzik, T. Butler, E. Fieremans, L.  
811 Axel, H. Rusinek, C. Nicholson, B. V. Zlokovic, B. Frangione, K. Blennow, J.  
812 Menard, H. Zetterberg, T. Wisniewski, and M. J. de Leon. 2015. 'Clearance systems in  
813 the brain-implications for Alzheimer disease', *Nat Rev Neurol*, 11: 457-70.
- 814 Varga, A. W., E. L. Ducca, A. Kishi, E. Fischer, A. Parekh, V. Koushyk, P. L. Yau, T. Gumb,  
815 D. P. Leibert, M. E. Wohlleber, O. E. Burschtin, A. Convit, D. M. Rapoport, R. S.  
816 Osorio, and I. Ayappa. 2016. 'Effects of aging on slow-wave sleep dynamics and  
817 human spatial navigational memory consolidation', *Neurobiol Aging*, 42: 142-49.
- 818 Varga, A. W., M. E. Wohlleber, S. Gimenez, S. Romero, J. F. Alonso, E. L. Ducca, K. Kam,  
819 C. Lewis, E. B. Tanzi, S. Tweardy, A. Kishi, A. Parekh, E. Fischer, T. Gumb, D.  
820 Alcolea, J. Fortea, A. Lleo, K. Blennow, H. Zetterberg, L. Mosconi, L. Glodzik, E.  
821 Pirraglia, O. E. Burschtin, M. J. de Leon, D. M. Rapoport, S. E. Lu, I. Ayappa, and R.  
822 S. Osorio. 2016. 'Reduced Slow-Wave Sleep Is Associated with High Cerebrospinal  
823 Fluid Abeta42 Levels in Cognitively Normal Elderly', *Sleep*, 39: 2041-48.
- 824 Wang, A., P. Das, R. C. Switzer, 3rd, T. E. Golde, and J. L. Jankowsky. 2011. 'Robust  
825 amyloid clearance in a mouse model of Alzheimer's disease provides novel insights  
826 into the mechanism of amyloid-beta immunotherapy', *J Neurosci*, 31: 4124-36.
- 827 Wang, M., F. Ding, S. Deng, X. Guo, W. Wang, J. J. Iliff, and M. Nedergaard. 2017. 'Focal  
828 Solute Trapping and Global Glymphatic Pathway Impairment in a Murine Model of  
829 Multiple Microinfarcts', *J Neurosci*, 37: 2870-77.
- 830 Weller, R. O., M. Subash, S. D. Preston, I. Mazanti, and R. O. Carare. 2008. 'Perivascular  
831 drainage of amyloid-beta peptides from the brain and its failure in cerebral amyloid  
832 angiopathy and Alzheimer's disease', *Brain Pathol*, 18: 253-66.
- 833 Xavier, A. L. R., N. L. Hauglund, S. von Holstein-Rathlou, Q. Li, S. Sanggaard, N. Lou, I.  
834 Lundgaard, and M. Nedergaard. 2018. 'Cannula Implantation into the Cisterna Magna  
835 of Rodents', *J Vis Exp*.
- 836 Xie, L., H. Kang, Q. Xu, M. J. Chen, Y. Liao, M. Thiyagarajan, J. O'Donnell, D. J.  
837 Christensen, C. Nicholson, J. J. Iliff, T. Takano, R. Deane, and M. Nedergaard. 2013.  
838 'Sleep drives metabolite clearance from the adult brain', *Science*, 342: 373-7.
- 839 Xu, Z., N. Xiao, Y. Chen, H. Huang, C. Marshall, J. Gao, Z. Cai, T. Wu, G. Hu, and M. Xiao.  
840 2015. 'Deletion of aquaporin-4 in APP/PS1 mice exacerbates brain Abeta  
841 accumulation and memory deficits', *Mol Neurodegener*, 10: 58.
- 842 Yang, J., L. K. Lunde, P. Nuntagij, T. Oguchi, L. M. Camassa, L. N. Nilsson, L. Lannfelt, Y.  
843 Xu, M. Amiry-Moghaddam, O. P. Ottersen, and R. Torp. 2011. 'Loss of astrocyte

844 polarization in the tg-ArcSwe mouse model of Alzheimer's disease', *J Alzheimers Dis*,  
845 27: 711-22.  
846 Zeppenfeld, D. M., M. Simon, J. D. Haswell, D. D'Abreo, C. Murchison, J. F. Quinn, M. R.  
847 Grafe, R. L. Woltjer, J. Kaye, and J. J. Iliff. 2017. 'Association of Perivascular  
848 Localization of Aquaporin-4 With Cognition and Alzheimer Disease in Aging Brains',  
849 *JAMA Neurol*, 74: 91-99.  
850 Zhou, Y., J. Cai, W. Zhang, X. Gong, S. Yan, K. Zhang, Z. Luo, J. Sun, Q. Jiang, and M. Lou.  
851 2020. 'Impairment of the Glymphatic Pathway and Putative Meningeal Lymphatic  
852 Vessels in the Aging Human', *Ann Neurol*, 87: 357-69.  
853 Zlokovic, B. V. 2011. 'Neurovascular pathways to neurodegeneration in Alzheimer's disease  
854 and other disorders', *Nat Rev Neurosci*, 12: 723-38.  
855 Zlokovic, B. V., S. Yamada, D. Holtzman, J. Ghiso, and B. Frangione. 2000. 'Clearance of  
856 amyloid beta-peptide from brain: transport or metabolism?', *Nat Med*, 6: 718-9.  
857

858

## 859 SUPPLEMENTARY DATA

### 860 ***Voxel-based analysis reflects differences in the distribution of Gd-DOTA across groups.***

861 To assess the differences in the spatial distribution of the Gd-DOTA between the CTL and AD groups,  
862 voxel-based analysis (VBA) was performed at four time-points after injection (30, 60, 90, 120 min). To  
863 this end, a two-sample *t*-test was performed on a voxel-by-voxel basis comparing the percent signal  
864 change from baseline across the CTL and AD groups. No statistical significance was observed after  
865 multiple comparison correction, but Additional Figure 1 presents uncorrected statistics ( $p < 0.05$ ,  
866 uncorrected) that indicate a general agreement with our ROI-based and cluster-based analyses.  
867 Specifically, percent signal change was higher in the AD group in areas nearby the injection site  
868 (pons, medulla; orange/yellow) as also observed in other analyses. In addition, VBA revealed signal  
869 decreases in AD relative to CTL in caudal areas close to the superior sagittal and transverse sinuses  
870 (blue) but note that signal intensity in those areas was low and within the variability observed in the  
871 non-injected groups and thus it is difficult to make robust conclusions.

872

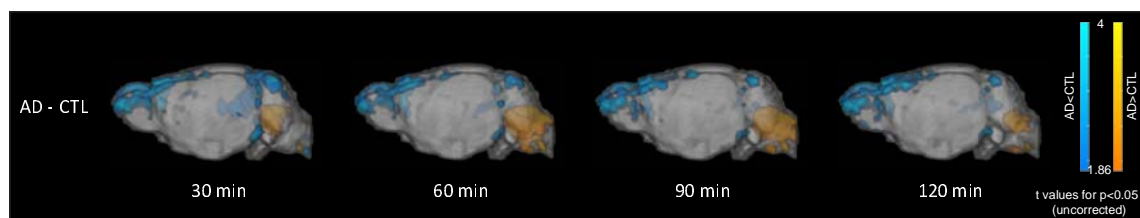

873 ***Additional Figure 1. Voxel-based analysis (VBA) comparing signal intensity of CTL and AD mice at***  
874 ***four time-points after injection (30, 60, 90, 120 min). The AD group demonstrated stronger signal***  
875 ***intensity in regions adjacent to the infusion spot (orange/yellow) in all time points and decreased***  
876 ***signal intensity in areas proximal to the superior sagittal and transverse sinuses (blue). The colour***  
877 ***scales indicate T-statistic values, with orange/yellow representing the voxels significantly higher in***  
878 ***the AD group and blue/cyan representing the voxels significantly higher in the CTL group ( $p < 0.05$ ,***  
879 ***uncorrected).***

880
